# Supplementary material for: Facile and highly chemoselective synthesis of benzil derivatives via oxidation of stilbenes in an I2–H2O system
Source: Royal Society of Chemistry journal article supplement (doi:10.1039/c3ra41489b), 2013-01-01

## Supporting Information

### Facile and highly chemoselective synthesis of benzil derivatives

#### *via* oxidation of stilbenes in I<sub>2</sub>/H<sub>2</sub>O System

Xianghua Zeng,<sup>a,b</sup> Chengxia Miao,<sup>a</sup> Shoufeng Wang, Chungu Xia<sup>a</sup> and Wei Sun<sup>\*a</sup>

<sup>a</sup> State Key Laboratory for Oxo Synthesis and Selective Oxidation, Lanzhou Institute of Chemical Physics, Chinese Academy of Sciences, Lanzhou, 730000 China

E-mail: wsun@licp.cas.cn

<sup>b</sup> Graduate School of the Chinese Academy of Sciences, Beijing, 100039 China

#### Table of Contents

##### 1. General Information

##### 2. General procedure for the oxidation of alkenes in I<sub>2</sub>/water system

##### 3. Supporting Table, Figures and Schemes

##### 4. Characterization data of the benzils 2a-w

##### 5. References

##### 6. Copies of 2a-w <sup>1</sup>H and <sup>13</sup>C NMR spectra

## 1. General Information

All reactions were conducted with teflon tubes. NMR spectra were recorded with a Bruker Avance III 400 MHz spectrometer. HRMS (ESI) was determined on a Bruker Daltonics micrOTOF-Q<sup>II</sup> mass spectrometer. Gas chromatography–mass spectrometry (GC/MS) experiments were performed on Agilent 7890A/5975C. <sup>1</sup>H and <sup>13</sup>C NMR chemical shifts (δ) are given in ppm relative to TMS (δ = 0 ppm) and ppm are downfield from tetramethylsilane (CDCl<sub>3</sub>; δ C = 77.0 ppm, residual CHCl<sub>3</sub> in CDCl<sub>3</sub>; δ H = 7.26 ppm). Unless otherwise noted, materials obtained from commercial suppliers were used without further purification. The substituted stilbenes were synthesized as following literature.<sup>1</sup>

## 2. General procedure for the oxidation of stilbenes in I<sub>2</sub>/H<sub>2</sub>O system

A mixture of stilbenes (0.2 mmol), iodine (0.4 mmol), water (1.0 mL) and MeCN (25 μL) were allowed to react for 20 h at 140 °C under air conditions in 25 mL sealed tube. After that the reaction mixture was extracted with dichloromethane (5 mL) and aq saturated solution of sodium thiosulfate (0.5 mL). The organic layer was dried over anhydrous sodium sulfate and concentrated in vacuo. The crude product was chromatographed on a silica gel column with a petroleum ether / ethyl acetate (v/v = 5/1) mixture to afford diketone derivatives in good to excellent yields.

### 3. Supporting Table, Figures and Scheme

**Table S1.** Oxidation of a series of alkynes and alkenes in I<sub>2</sub>/H<sub>2</sub>O system<sup>a</sup>

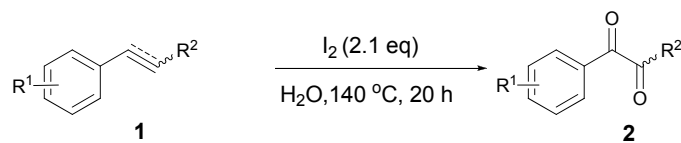

| Entry | Substrate | Product | Yield(%) <sup>b</sup> |
|-------|-----------|---------|-----------------------|
| 1     |           |         | trace                 |
| 2     |           |         | NR <sup>c</sup>       |
| 3     |           |         | NR <sup>c</sup>       |
| 4     |           |         | NR <sup>c</sup>       |
| 5     |           |         | NR <sup>c</sup>       |
| 6     |           |         | 92                    |
| 7     |           |         | 95                    |

<sup>a</sup> Unless otherwise noted, all reactions were run with **1** (0.2 mmol), I<sub>2</sub> (0.40 mmol), H<sub>2</sub>O (1.0 mL) and MeCN (25 μL) at 140 °C for 20 h under air condition in sealed tubes. <sup>b</sup> Isolated yield. <sup>c</sup> NR= No Reaction.

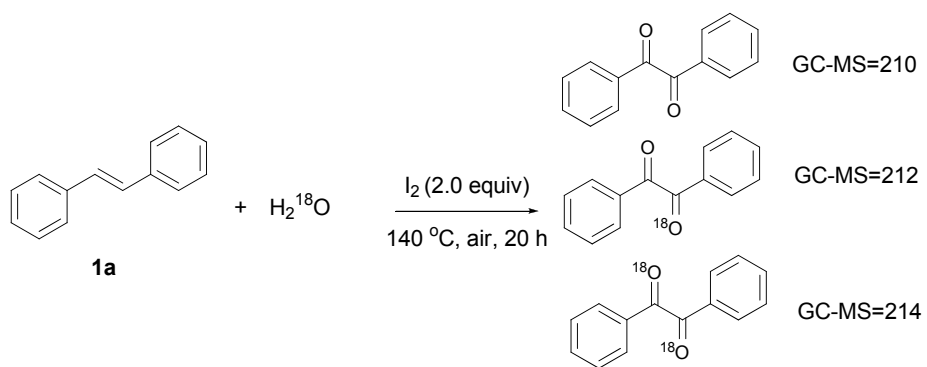

**Scheme S1.** Isotopic labelling experiments of **1a** with  $\text{H}_2^{18}\text{O}$ .

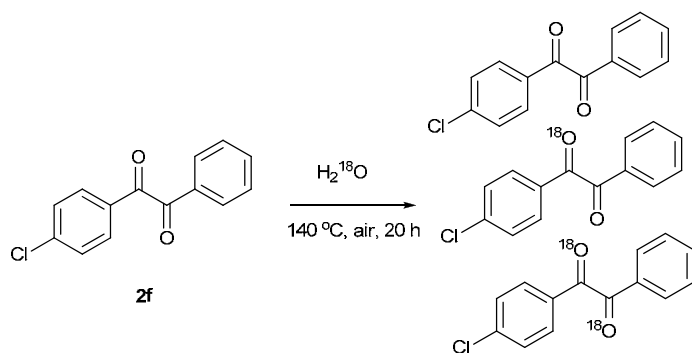

**Scheme S2.** Isotopic labelling experiments of **2f** exchanging oxygen atom with  $\text{H}_2^{18}\text{O}$ .

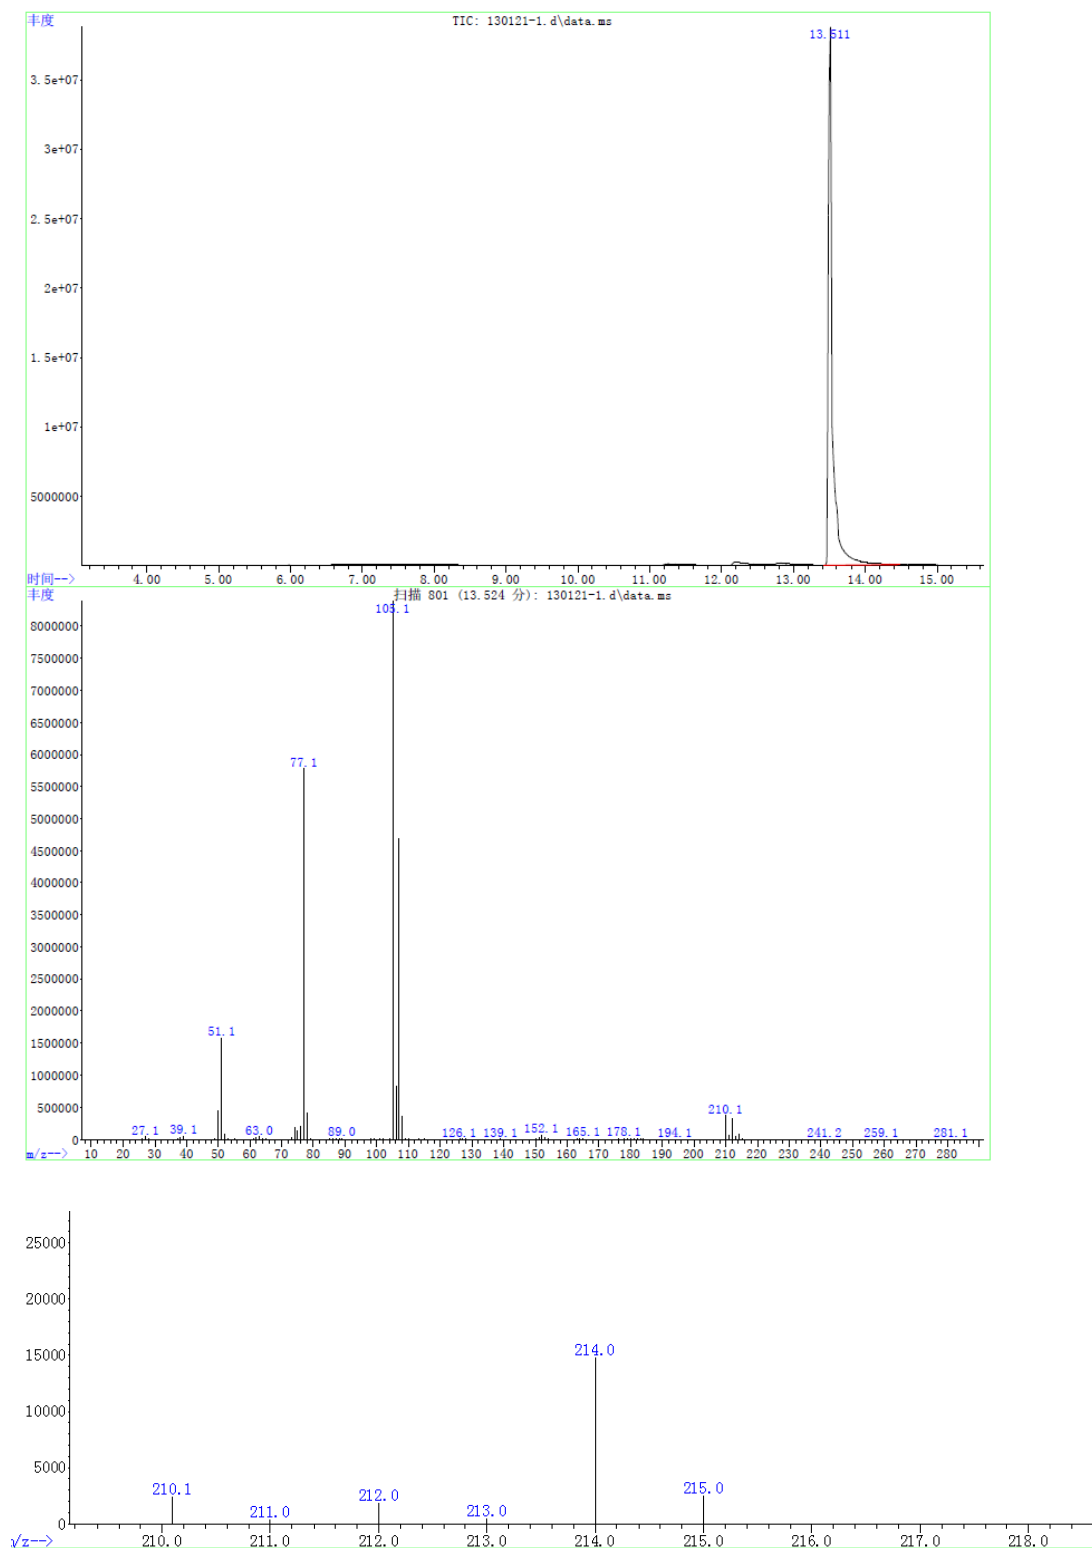

**Figure S1.** GC-MS Spectra of the product obtained in 97% H<sub>2</sub><sup>18</sup>O.

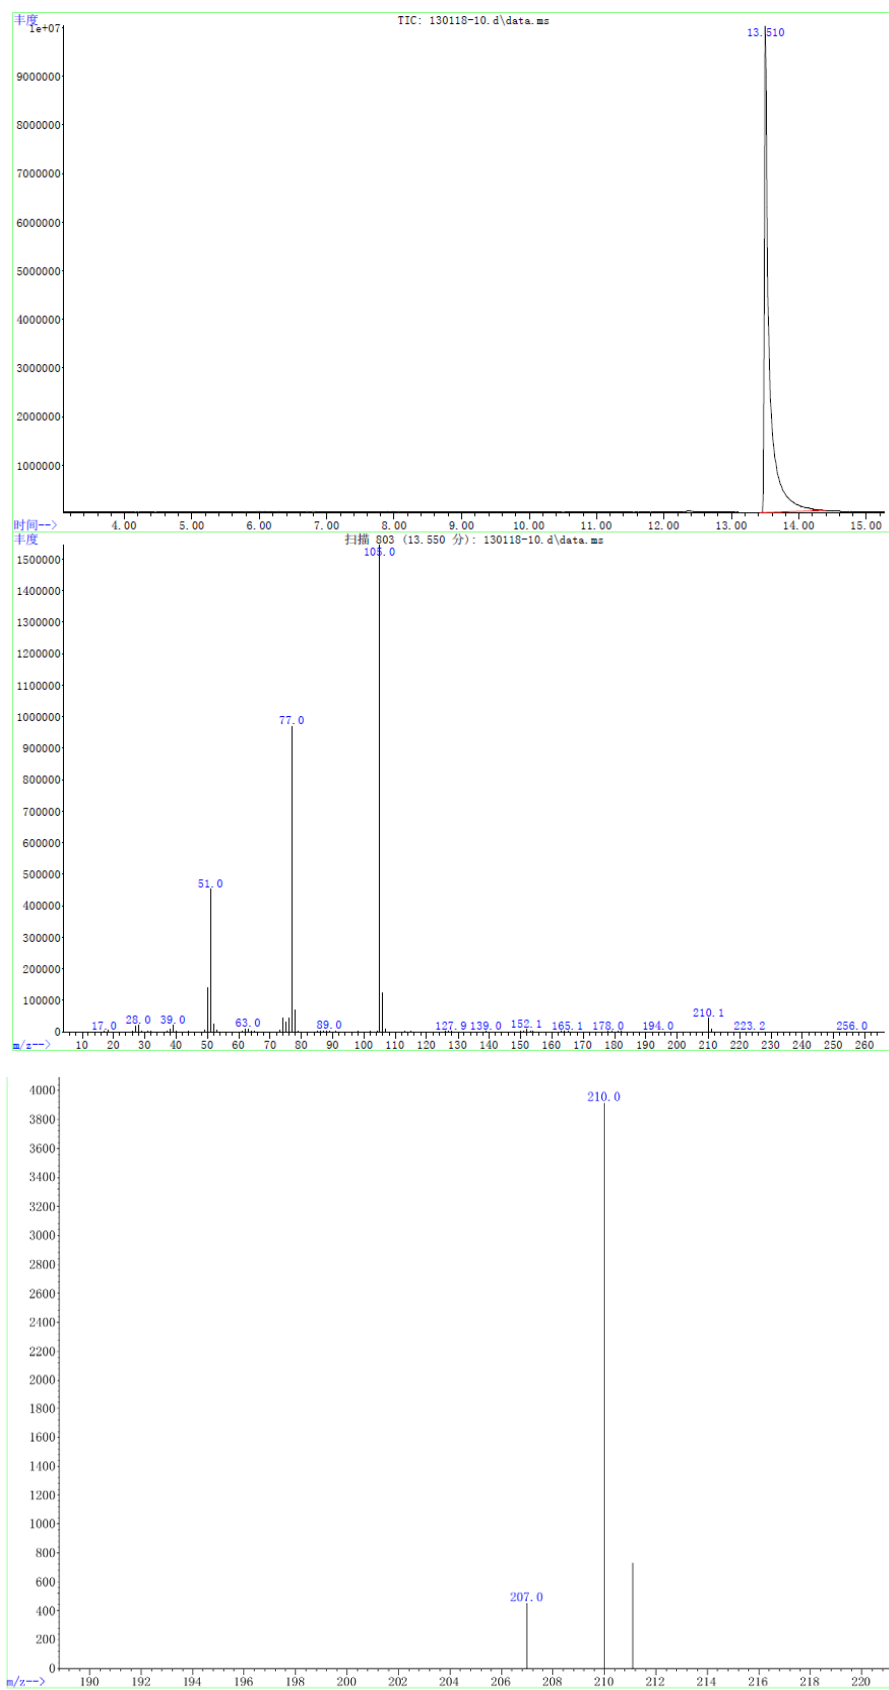

**Figure S2.** GC-MS Spectra of the product obtained in H<sub>2</sub>O.

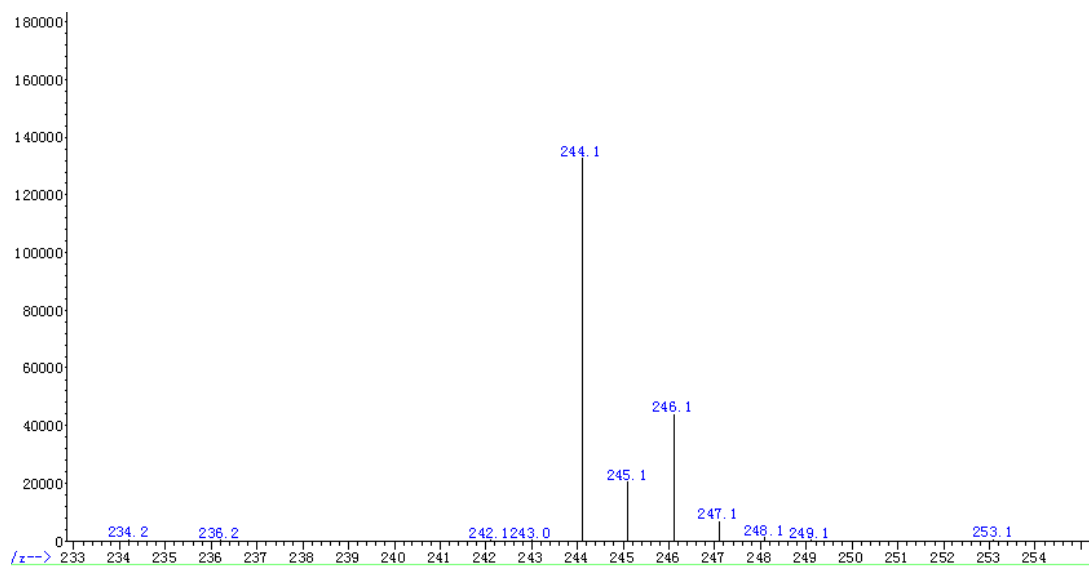

**Figure S3.** GC-MS spectra of **2f** obtained from the optimized reaction conditions.

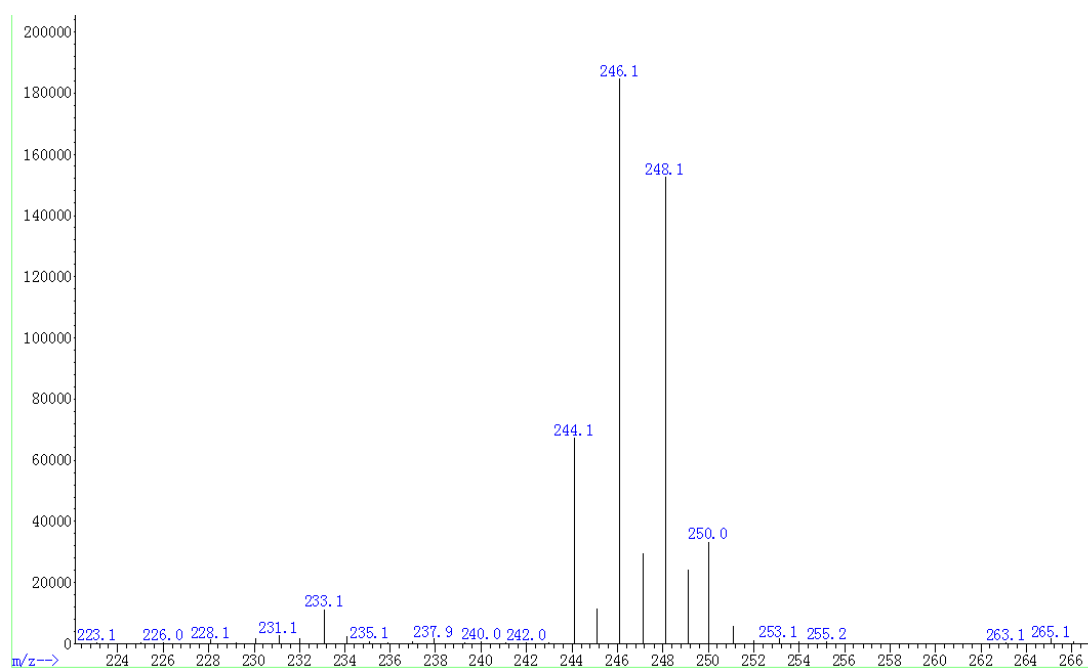

**Figure S4.** GC-MS spectra of **2f** obtained from the exchange oxygen atom in  $H_2^{18}O$  under the optimized conditions.

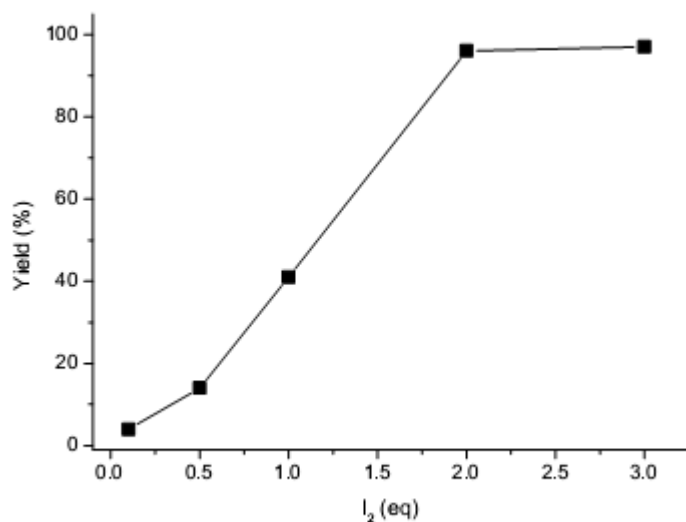

**Figure S5.** The influence of the amount of iodine on the yield.

#### 4. Characterization data of the diones 2a-w

##### benzil (2a)<sup>2</sup>

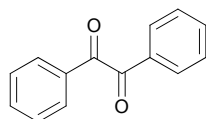

Yellow solid, (39.1 mg, 93%). <sup>1</sup>H NMR (CDCl<sub>3</sub>, 400 MHz)  $\delta$  = 7.97-7.99 (m, 4H), 7.65-7.69 (m, 2H), 7.50-7.54 (m, 4H); <sup>13</sup>C NMR (CDCl<sub>3</sub>, 100 MHz)  $\delta$  = 194.6, 135.0, 133.0, 129.9, 129.0. GC/MS (EI-MS) m/z: 210.0. HRMS m/z: [M+Na]<sup>+</sup> Calcd for C<sub>14</sub>H<sub>10</sub>O<sub>2</sub>Na 233.0573; Found 233.0575.

##### 1-phenyl-2-*p*-tolylethane-1,2-dione (2b)<sup>2</sup>

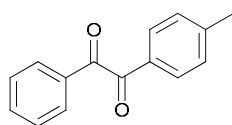

Yellow solid, (42.1 mg, 94%). <sup>1</sup>H NMR (CDCl<sub>3</sub>, 400 MHz)  $\delta$  = 7.96-7.98 (dd, *J* = 8.4, 1.2 Hz, 2H), 7.87 (d, *J* = 8.4 Hz, 2H), 7.62-7.66 (m, 1H), 7.48-7.52 (m, 2H), 7.30 (d, *J* = 8.0 Hz, 2H), 2.44 (s, 3H); <sup>13</sup>C NMR (CDCl<sub>3</sub>, 100 MHz)  $\delta$  = 194.8, 194.3, 146.3, 134.8, 133.1, 130.6, 130.0, 129.9, 129.8, 129.0, 22.0. GC/MS (EI-MS) m/z: 224.1.

##### 1-phenyl-2-*m*-tolylethane-1,2-dione (2c)<sup>4</sup>

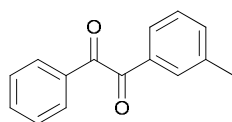

Yellow solid, (43.4 mg, 97%). <sup>1</sup>H NMR (CDCl<sub>3</sub>, 400 MHz)  $\delta$  = 7.96-7.98 (m, 2H),



7.76-7.78 (m, 2H), 7.63-7.68 (m, 1H), 7.46-7.53 (m, 3H), 7.39 (t,  $J=7.6$  Hz, 1H), 2.40 (s, 3H);  $^{13}\text{C}$  NMR ( $\text{CDCl}_3$ , 100 MHz)  $\delta = 194.9, 194.7, 139.0, 135.6, 134.9, 133.1, 133.0, 130.2, 129.9, 129.0, 128.9, 127.3, 21.3$ . GC/MS (EI-MS)  $m/z$ : 224.1.

**1-phenyl-2-*o*-tolylethane-1,2-dione (2d)<sup>2</sup>**

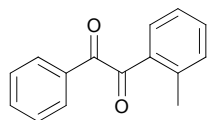

Yellow solid, (43.4 mg, 97%).  $^1\text{H}$  NMR ( $\text{CDCl}_3$ , 400 MHz)  $\delta = 7.96-7.98$  (m, 2H), 7.63-7.67 (m, 2H), 7.46-7.53 (m, 3H), 7.34 (d,  $J = 7.6$  Hz, 1H), 7.25-7.28 (m, 3H), 2.71 (s, 3H);  $^{13}\text{C}$  NMR ( $\text{CDCl}_3$ , 100 MHz)  $\delta = 196.8, 194.9, 141.4, 134.7, 133.8, 133.2, 133.1, 132.6, 131.8, 130.0, 129.0, 126.1, 21.9$ . GC/MS (EI-MS)  $m/z$ : 224.1.

**1-(4-methoxyphenyl)-2-phenylethane-1,2-dione (2e)<sup>2</sup>**

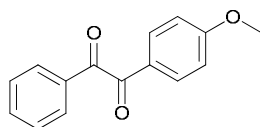

Yellow solid, (26.9 mg, 56%).  $^1\text{H}$  NMR ( $\text{CDCl}_3$ , 400 MHz)  $\delta = 7.87-7.91$  (m, 4H), 7.56-7.60 (m, 1H), 7.42-7.46 (m, 2H), 6.91 (d,  $J = 9.2$  Hz, 2H), 2.82 (s, 3H);  $^{13}\text{C}$  NMR ( $\text{CDCl}_3$ , 100 MHz)  $\delta = 193.8, 192.1, 164.0, 133.7, 132.2, 131.4, 28.9, 127.9, 15.1, 113.4, 54.6$ . GC/MS (EI-MS)  $m/z$ : 240.1.

**1-(4-chlorophenyl)-2-phenylethane-1,2-dione (2f)<sup>5</sup>**

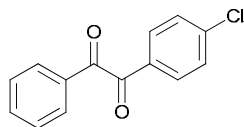

Yellow solid, (47.8 mg, 98%).  $^1\text{H}$  NMR ( $\text{CDCl}_3$ , 400 MHz)  $\delta = 7.91-7.97$  (m, 4H), 7.66-7.69 (m, 1H), 7.48-7.54 (m, 4H);  $^{13}\text{C}$  NMR ( $\text{CDCl}_3$ , 100 MHz)  $\delta = 193.9, 193.1, 141.6, 135.1, 132.8, 131.4, 131.3, 130.0, 129.5, 129.1$ . GC/MS (EI-MS)  $m/z$ : 244.1.

**1-(3-chlorophenyl)-2-phenylethane-1,2-dione (2g)<sup>1</sup>**

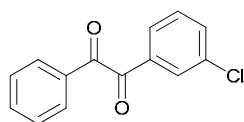

Yellow solid, (46.8 mg, 96%).  $^1\text{H}$  NMR ( $\text{CDCl}_3$ , 400 MHz)  $\delta = 7.96-7.98$  (m, 2H), 7.84 (d,  $J=8.0$  Hz, 1H), 7.62-7.70 (m, 2H), 7.44-7.55 (m, 3H), 7.35-7.39 (m, 1H);  $^{13}\text{C}$  NMR ( $\text{CDCl}_3$ , 100 MHz)  $\delta = 193.6, 193.0, 139.3, 135.2, 134.8, 130.4, 130.0, 129.6, 129.1, 128.2, 126.7, 124.8$ . GC/MS (EI-MS)  $m/z$ : 243.9.

**1-(2-chlorophenyl)-2-phenylethane-1,2-dione (2h)<sup>1</sup>**

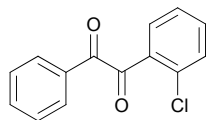

Yellow solid, (44.4 mg, 91%).  $^1\text{H}$  NMR ( $\text{CDCl}_3$ , 400 MHz)  $\delta$  = 8.03-8.05 (m, 2H), 7.90-7.93 (m, 2H), 7.65-7.69 (m, 1H), 7.52-7.57 (m, 3H), 7.43-7.47 (m, 2H);  $^{13}\text{C}$  NMR ( $\text{CDCl}_3$ , 100 MHz)  $\delta$  = 193.7, 192.1, 134.6, 134.5, 134.0, 133.9, 132.5, 132.2, 130.5, 130.3, 128.9, 127.4. GC/MS (EI-MS)  $m/z$ : 244.0.

**1-(4-bromophenyl)-2-phenylethane-1,2-dione (2i)<sup>2</sup>**

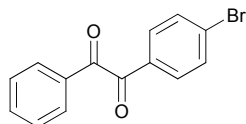

Yellow solid, (51.3 mg, 89%).  $^1\text{H}$  NMR ( $\text{CDCl}_3$ , 400 MHz)  $\delta$  = 7.95-7.97 (m, 2H), 7.83-7.85 (m, 2H), 7.65-7.69 (m, 3H), 7.50-7.54 (m, 3H);  $^{13}\text{C}$  NMR ( $\text{CDCl}_3$ , 100 MHz)  $\delta$  = 193.9, 193.3, 135.1, 132.8, 132.5, 131.8, 131.3, 130.5, 130.0, 129.1. GC/MS (EI-MS)  $m/z$ : 290.0.

**1-(3-bromophenyl)-2-phenylethane-1,2-dione (2j)<sup>6</sup>**

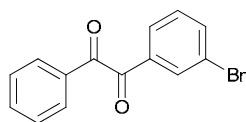

Yellow solid, (53.0 mg, 92%).  $^1\text{H}$  NMR ( $\text{CDCl}_3$ , 400 MHz)  $\delta$  = 8.12-8.13 (m, 1H), 7.95-7.98 (m, 2H), 7.87-7.89 (m, 1H), 7.76-7.79 (m, 1H), 7.65-7.70 (m, 1H), 7.50-7.54 (m, 2H), 7.39 (d,  $J$  = 8.0 Hz, 1H);  $^{13}\text{C}$  NMR ( $\text{CDCl}_3$ , 100 MHz)  $\delta$  = 193.6, 192.9, 137.7, 135.2, 134.7, 132.7, 132.5, 130.6, 130.0, 129.1, 128.6, 123.4. GC/MS (EI-MS)  $m/z$ : 290.0.

**1-(2-bromophenyl)-2-phenylethane-1,2-dione (2k)<sup>7</sup>**

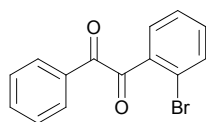

Yellow solid, (50.7 mg, 88%).  $^1\text{H}$  NMR ( $\text{CDCl}_3$ , 400 MHz)  $\delta$  = 8.06-8.09 (m, 2H), 7.81-7.83 (m, 1H), 7.62-7.69 (m, 2H), 7.42-7.54 (m, 4H);  $^{13}\text{C}$  NMR ( $\text{CDCl}_3$ , 100 MHz)  $\delta$  = 194.2, 191.5, 136.0, 134.5, 134.4, 133.8, 132.7, 132.6, 130.4, 128.9, 127.9, 121.8. GC/MS (EI-MS)  $m/z$ : 290.0.

**1-(2,4-dichlorophenyl)-2-phenylethane-1,2-dione (2l)<sup>7</sup>**

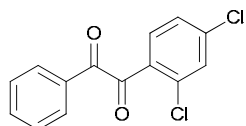

Yellow solid, (50.0 mg, 90%).  $^1\text{H}$  NMR ( $\text{CDCl}_3$ , 400 MHz)  $\delta$  = 8.00-8.03 (m, 2H), 7.86 (d,  $J$  = 8.4 Hz, 1H), 7.65-7.69 (m, 1H), 7.52-7.56 (m, 2H), 7.41-7.46 (m, 2H);  $^{13}\text{C}$  NMR ( $\text{CDCl}_3$ , 100 MHz)  $\delta$  = 192.5, 191.7, 140.6, 134.9, 134.7, 133.1, 132.3, 132.2, 130.5, 130.2, 129.0, 128.0. GC/MS (EI-MS)  $m/z$ : 278.0.

**1-(2,6-dichlorophenyl)-2-phenylethane-1,2-dione (2m)**

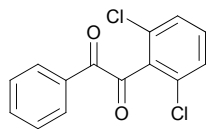

Yellow solid, (43.4 mg, 78%).  $^1\text{H}$  NMR ( $\text{CDCl}_3$ , 400 MHz)  $\delta$  = 8.07-8.09 (m, 2H), 7.56-7.60 (m, 1H), 7.42-7.46 (m, 2H), 7.15-7.25 (m, 3H);  $^{13}\text{C}$  NMR ( $\text{CDCl}_3$ , 100 MHz)  $\delta$  = 190.0, 188.3, 134.7, 134.7, 133.0, 132.1, 130.8, 130.1, 128.8, 128.4, 127.4. GC/MS  $m/z$ , Calcd: 278.0, Found: 278.0. HRMS  $m/z$ :  $[\text{M}+\text{Na}]^+$  Calcd for  $\text{C}_{14}\text{H}_8\text{Cl}_2\text{O}_2\text{Na}$  300.9794; Found 300.9797.

**1-(naphthalen-1-yl)-2-phenylethane-1,2-dione (2n)<sup>8</sup>**

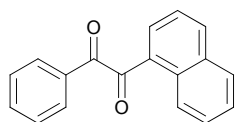

Yellow solid, (46.8 mg, 90%).  $^1\text{H}$  NMR ( $\text{CDCl}_3$ , 400 MHz)  $\delta$  = 9.33 (d,  $J=8.8$  Hz, 1H), 8.12 (d,  $J=8.0$  Hz, 1H), 8.04-7.06 (m, 2H), 7.92-7.96 (m, 2H), 7.74-7.78 (m, 1H), 7.62-7.69 (m, 2H), 7.47-7.55 (m, 2H);  $^{13}\text{C}$  NMR ( $\text{CDCl}_3$ , 100 MHz)  $\delta$  = 197.2, 194.6, 136.0, 135.1, 134.8, 134.1, 133.4, 131.0, 130.1, 129.5, 129.1, 128.8, 128.7, 127.2, 126.0, 124.5. GC/MS (EI-MS)  $m/z$ : 260.1.

**1-(4-fluorophenyl)-2-phenylethane-1,2-dione (2o)<sup>4</sup>**

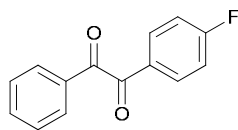

Yellow solid, (44.7 mg, 98%).  $^1\text{H}$  NMR ( $\text{CDCl}_3$ , 400 MHz)  $\delta$  = 7.96-8.05 (m, 4H), 7.65-7.69 (m, 1H), 7.50-7.54 (m, 2H), 7.16-7.22 (m, 2H);  $^{13}\text{C}$  NMR ( $\text{CDCl}_3$ , 100 MHz)  $\delta$  = 194.1, 192.8, 171.1 (d,  $J = 257.0$  Hz), 135.0, 132.9, 132.7 (d,  $J = 11.0$  Hz), 130.0, 129.5 (d,  $J = 3.0$  Hz), 129.1, 116.4 (d,  $J = 22.0$  Hz). GC/MS (EI-MS)  $m/z$ : 228.1.

**1-phenyl-2-(4-(trifluoromethyl)phenyl)ethane-1,2-dione (2p)<sup>1</sup>**

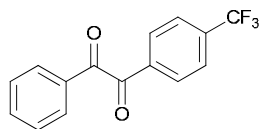

Yellow solid, (50.6 mg, 91%).  $^1\text{H}$  NMR ( $\text{CDCl}_3$ , 400 MHz)  $\delta$  = 8.10 (d,  $J = 8.0$  Hz, 2H), 7.97-7.99 (m, 2H), 7.78 (d,  $J = 8.0$  Hz, 2H), 7.67-7.71 (m, 1H), 7.52-7.56 (m, 2H);  $^{13}\text{C}$  NMR ( $\text{CDCl}_3$ , 100 MHz)  $\delta$  = 193.5, 193.0, 136.0, 135.6 (d,  $J = 8.0$  Hz), 133.9 (d,  $J = 264.0$  Hz), 130.2, 130.0, 129.2, 126.1 (q,  $J = 4.0$  Hz), 124.7, 122.0. GC/MS (EI-MS)  $m/z$ : 278.1.

**1-(4-chlorophenyl)-2-p-tolylethane-1,2-dione (2q)<sup>9</sup>**

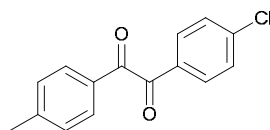

Yellow solid, (49.5 mg, 96%).  $^1\text{H}$  NMR ( $\text{CDCl}_3$ , 400 MHz)  $\delta$  = 7.91 (dd,  $J=6.8, 2.0$

Hz, 2H), 7.85(dd,  $J=6.8, 1.6$  Hz, 2H), 7.47(dd,  $J=6.8, 2.0$  Hz, 2H), 7.31 (d,  $J=8.0$  Hz, 2H), 2.44 (s, 3H);  $^{13}\text{C}$  NMR ( $\text{CDCl}_3$ , 100 MHz)  $\delta = 192.6, 192.2, 145.4, 140.4, 130.4, 130.2, 129.4, 129.0, 128.8, 128.4, 20.9$ . GC/MS (EI-MS)  $m/z$ : 258.1.

**1-(4-chlorophenyl)-2-m-tolylolethane-1,2-dione (2r)**

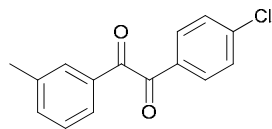

Yellow solid, (49.5 mg, 96%).  $^1\text{H}$  NMR ( $\text{CDCl}_3$ , 400 MHz)  $\delta = 7.90\text{-}7.93$  (m, 2H), 7.74-7.77 (m, 2H), 7.47-7.50 (m, 3H), 7.40 (t,  $J = 7.6$  Hz, 1H), 2.41 (s, 3H);  $^{13}\text{C}$  NMR ( $\text{CDCl}_3$ , 100 MHz)  $\delta = 194.2, 193.2, 141.6, 139.1, 136.0, 132.9, 131.4, 130.3, 129.4, 129.0, 127.3, 21.3$ . GC/MS  $m/z$ , Calcd: 258.0, Found: 258.1. HRMS  $m/z$ :  $[\text{M}+\text{Na}]^+$  Calcd for  $\text{C}_{15}\text{H}_{11}\text{ClO}_2\text{Na}$  281.0340; Found 281.0346.

**1-(4-chlorophenyl)-2-o-tolylolethane-1,2-dione (2s)**

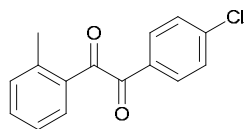

Yellow solid, (49.0 mg, 95%).  $^1\text{H}$  NMR ( $\text{CDCl}_3$ , 400 MHz)  $\delta = 7.90\text{-}7.94$  (m, 2H), 7.61 (d,  $J=7.6$  Hz, 1H), 7.48-7.52 (m, 3H), 7.34-7.36 (m, 1H), 7.27-7.29 (m, 1H), 2.69 (s, 3H);  $^{13}\text{C}$  NMR ( $\text{CDCl}_3$ , 100 MHz)  $\delta = 196.2, 193.4, 141.5, 141.4, 134.0, 133.0, 132.7, 131.6, 131.5, 131.3, 129.5, 126.1, 21.9$ . GC/MS  $m/z$ , Calcd: 258.0, Found: 258.1. HRMS  $m/z$ :  $[\text{M}+\text{Na}]^+$  Calcd for  $\text{C}_{15}\text{H}_{11}\text{ClO}_2\text{Na}$  281.0340; Found 281.0344.

**1-(4-chlorophenyl)-2-(4-fluorophenyl)ethane-1,2-dione (2t)<sup>10</sup>**

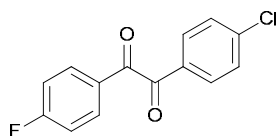

Yellow solid, (48.8 mg, 93%).  $^1\text{H}$  NMR ( $\text{CDCl}_3$ , 400 MHz)  $\delta = 7.99\text{-}8.03$  (m, 2H), 7.90-7.94 (m, 2H), 7.48-7.51 (m, 2H), 7.17-7.21 (m, 2H);  $^{13}\text{C}$  NMR ( $\text{CDCl}_3$ , 100 MHz)  $\delta = 192.6, 192.0, 166.8$  (d,  $J = 257.0$  Hz), 141.8, 132.7 (d,  $J = 9.0$  Hz), 131.3, 131.2, 129.5, 129.2 (d,  $J = 3.0$  Hz), 116.5 (d,  $J = 23.0$  Hz). GC/MS (EI-MS)  $m/z$ : 262.1.

**1-(4-bromophenyl)-2-(4-chlorophenyl)ethane-1,2-dione (2u)<sup>10</sup>**

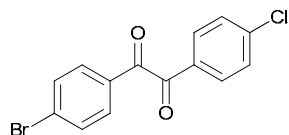

Yellow solid, (50.4 mg, 78%).  $^1\text{H}$  NMR ( $\text{CDCl}_3$ , 400 MHz)  $\delta = 7.91\text{-}7.93$  (m, 2H), 7.83 (dd,  $J = 6.8, 1.6$  Hz, 2H), 7.64-7.68 (m, 2H), 7.50 (dd,  $J = 6.8, 2.0$  Hz, 2H);  $^{13}\text{C}$  NMR ( $\text{CDCl}_3$ , 100 MHz)  $\delta = 192.6, 192.3, 141.9, 132.5, 131.5, 131.3, 131.1, 130.8, 129.5, 128.8$ . GC/MS (EI-MS)  $m/z$ : 324.0.

**1-(3-chlorophenyl)-2-(4-chlorophenyl)ethane-1,2-dione (2v)<sup>11</sup>**

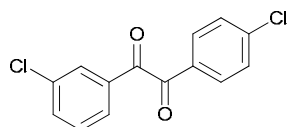

Yellow solid, (54.0 mg, 97%).  $^1\text{H NMR}$  ( $\text{CDCl}_3$ , 400 MHz)  $\delta$  = 7.96-7.97 (m, 1H), 7.91-7.94 (m, 2H), 7.83 (d,  $J$  = 8.0 Hz, 2H), 7.63-7.65 (m, 1H), 7.45-7.52 (m, 3H);  $^{13}\text{C NMR}$  ( $\text{CDCl}_3$ , 100 MHz)  $\delta$  = 192.3, 192.1, 141.9, 135.5, 135.0, 134.3, 131.3, 131.0, 130.4, 129.7, 129.6, 128.2. GC/MS (EI-MS)  $m/z$ : 278.0.

#### 1-(4-chlorophenyl)-2-(2-(trifluoromethyl)phenyl)ethane-1,2-dione (2w)

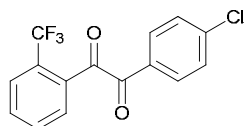

Yellow solid, (50.7 mg, 81%).  $^1\text{H NMR}$  ( $\text{CDCl}_3$ , 400 MHz)  $\delta$  = 8.03-8.07 (m, 2H), 7.79-7.81 (m, 1H), 7.68-7.74 (m, 3H), 7.50-7.54 (m, 2H);  $^{13}\text{C NMR}$  ( $\text{CDCl}_3$ , 100 MHz)  $\delta$  = 192.7, 189.3, 141.6, 166.8 (d,  $J$  = 257.0 Hz), 141.8, 134.4, 132.4, 132.0, 131.8, 130.7, 129.4, 127.0 (d,  $J$  = 6.0 Hz), 124.8, 122.1. GC/MS  $m/z$ , Calcd: 312.0, Found: 311.9. HRMS  $m/z$ :  $[\text{M}+\text{Na}]^+$  Calcd for  $\text{C}_{15}\text{H}_8\text{ClF}_3\text{O}_2\text{Na}$  335.0057; Found 335.0063.

## 5. References

1. S. Chen, Z. Liu, E. Shi, L. Chen, W. Wei, H. Li, Y. Cheng and X. Wan, *Org. Lett.*, 2011, **13**, 2274.
2. S. Chen, Z. Liu, E. Shi, L. Chen, W. Wei, H. Li, Y. Cheng and X. Wan, *Org. Lett.*, 2009, **11**, 1841.
3. C.-F. Xu, M. Xu, Y.-X. Jia and C.-Y. Li, *Org. Lett.*, 2011, **13**, 1556.
4. W. Ren, J. Liu, L. Chen and X. Wan, *Adv. Synth. Catal.*, 2010, **352**, 1424.
5. S. Mori, M. Takubo, T. Yanase, T. Maegawa, Y. Monguchi and H. Sajikia, *Adv. Synth. Catal.*, 2010, **352**, 1630.
6. L. Huang, K. Cheng, B. Yao, Y. Xie and Y. Zhang, *J. Org. Chem.*, 2011, **76**, 5732.
7. M. Tiecco, L. Testaferri, M. Tingoli, D. Chianelli and D. Bartoli, *J. Org. Chem.*, 1991, **56**, 4529.
8. M. D. Clayton, Z. Marcinow and P. W. Rabideau, *Tetrahedron Lett.*, 1998, **39**, 9127.
9. M. R. Rohman, I. Kharkongor, M. Rajbangshi, H. Mecedon, B. M. Laloo, P. R. Sahu, I. Kharbangar and B. Myrboh, *Eur. J. Org. Chem.*, 2012, 3208.
10. R. Ramajayam, R. Giridhar, M. R. Yadav, R. Balaraman, H. Djaballah, D. Shum and C. Radu, *Eur. J. Med. Chem.*, 2008, **43**, 2004.
11. A. Miyashita, H. Matsuda, T. Higashino, *Chem. Pharm. Bull.*, 1992, **40**, 2627.

## 6. Copies of the diones 2a-w $^1\text{H}$ and $^{13}\text{C}$ NMR spectra 2a

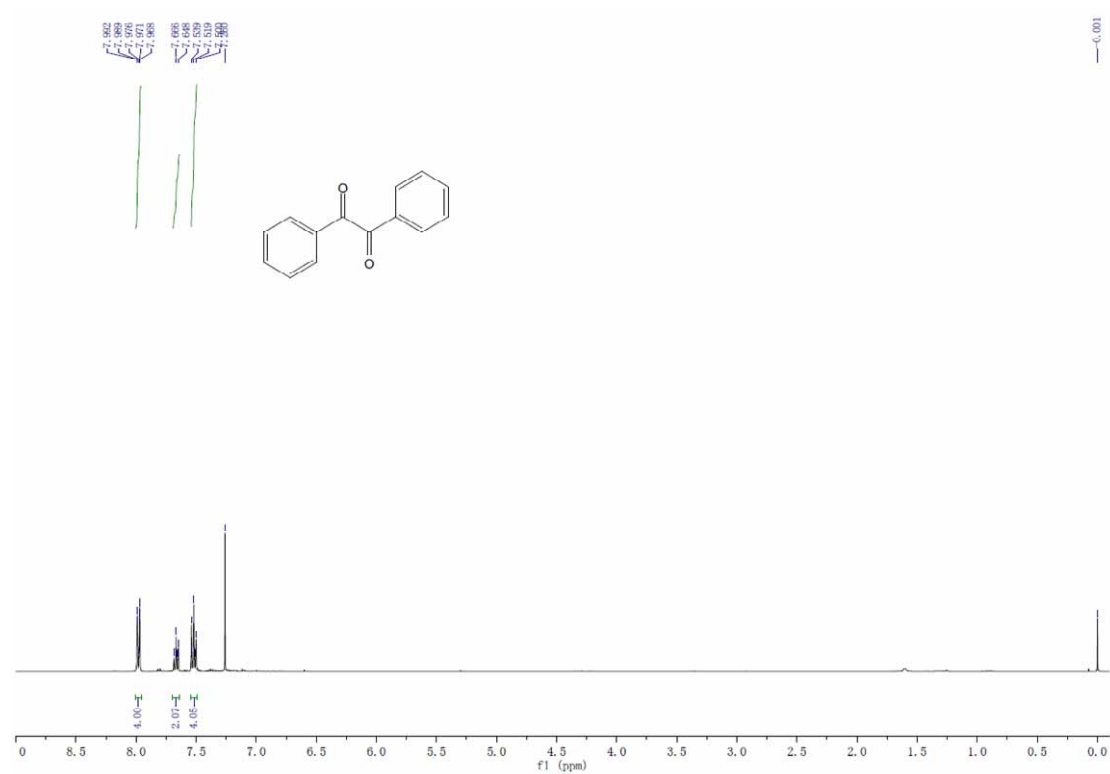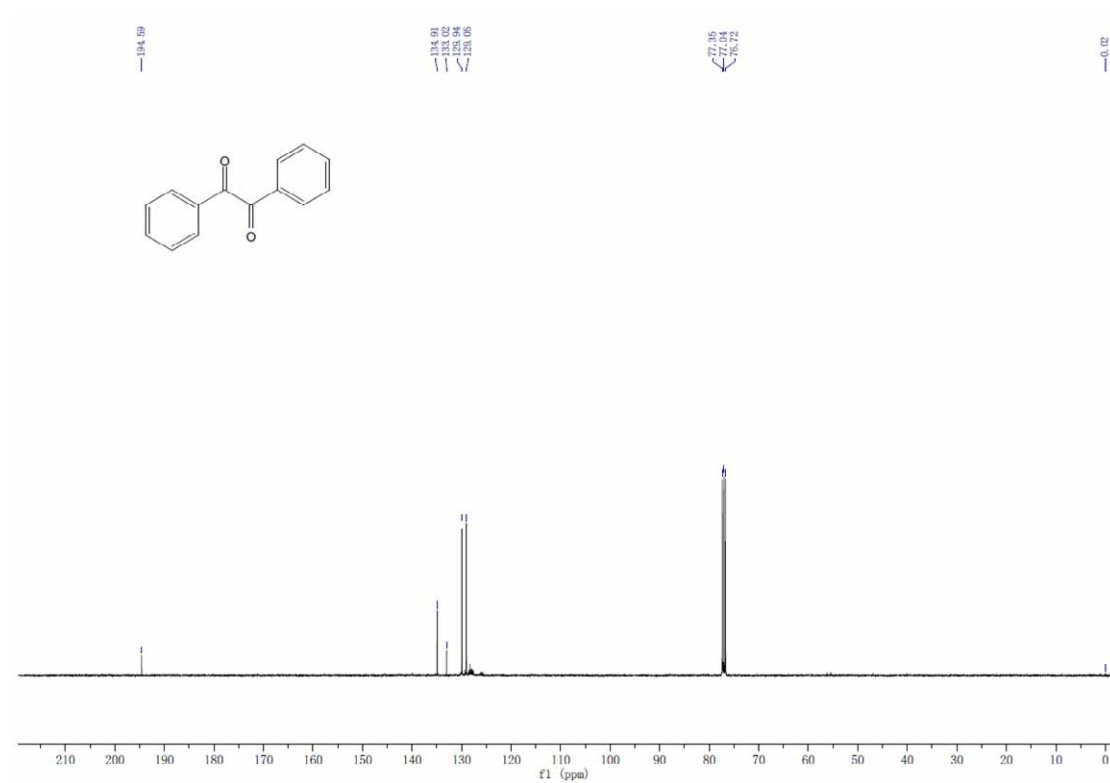

2b

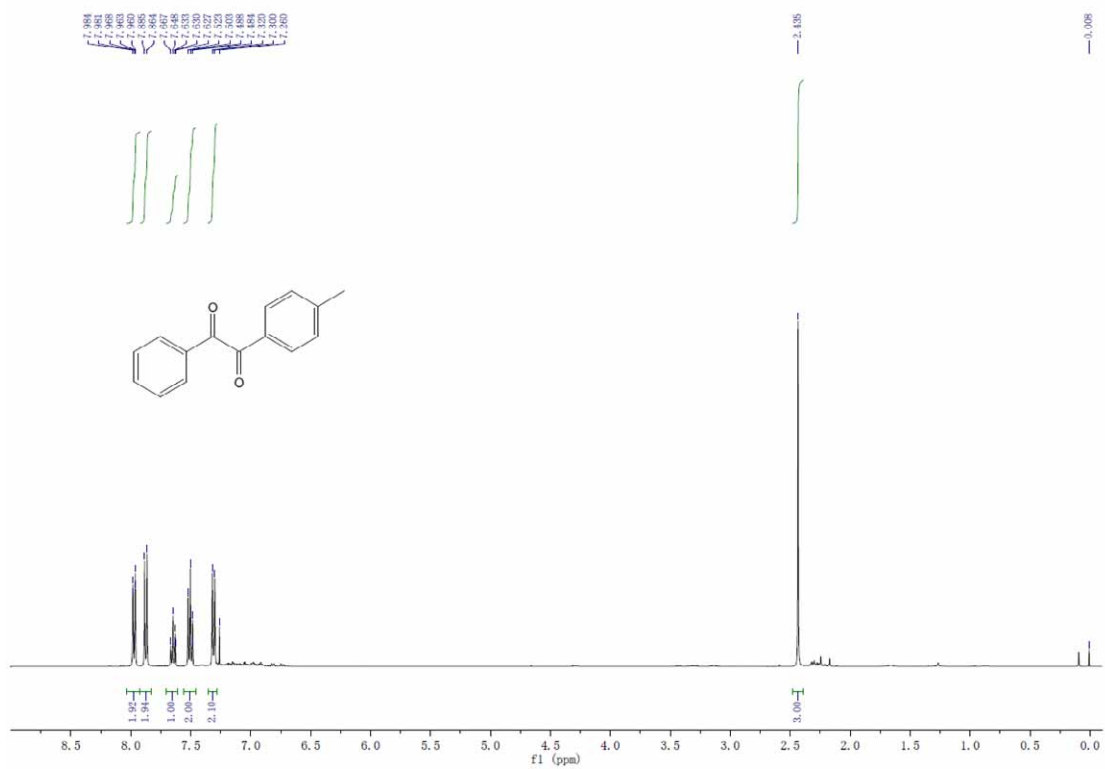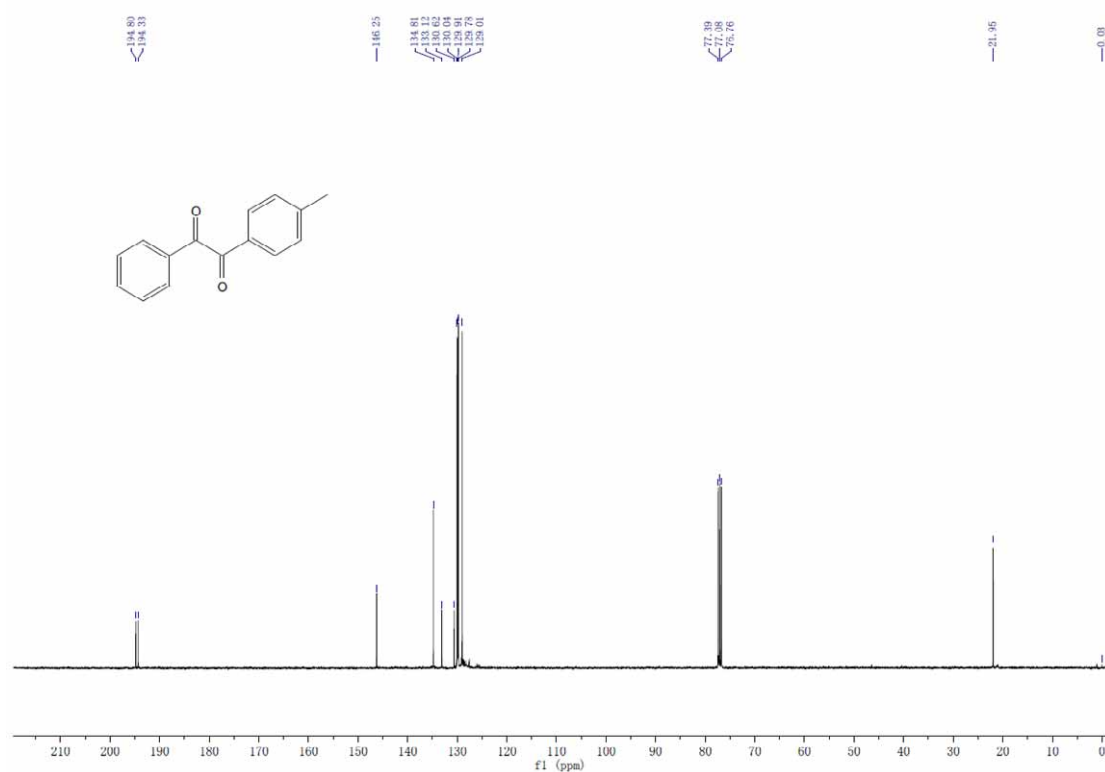

2c

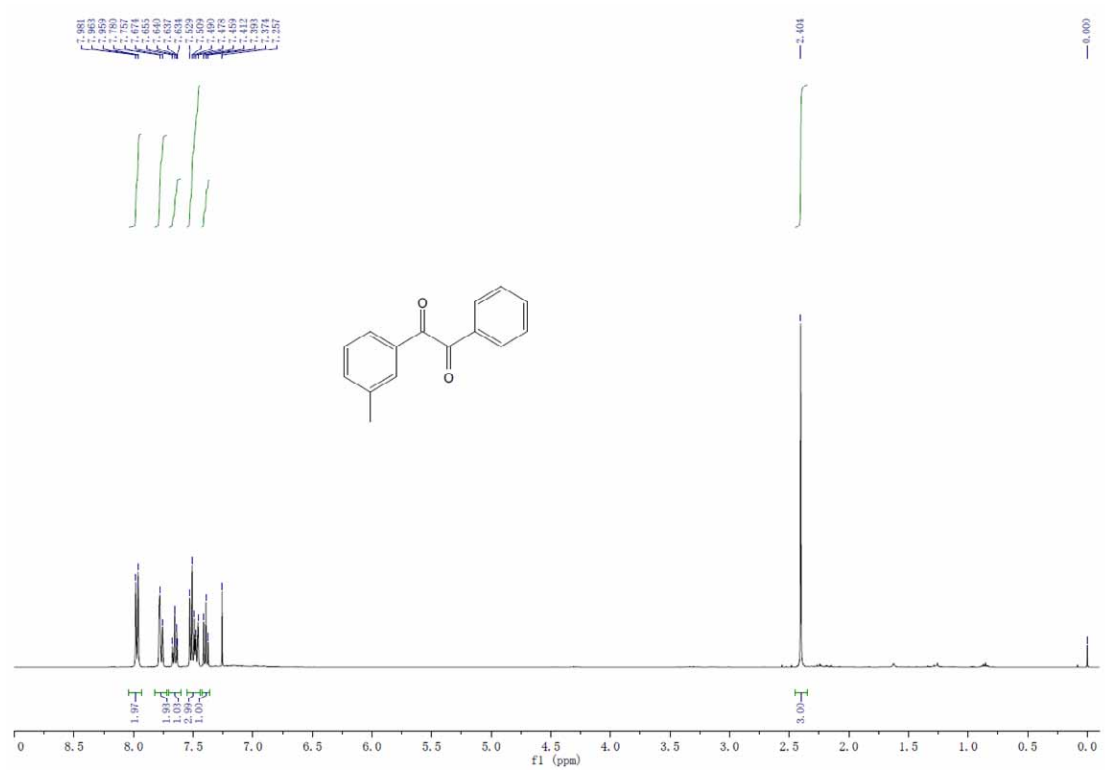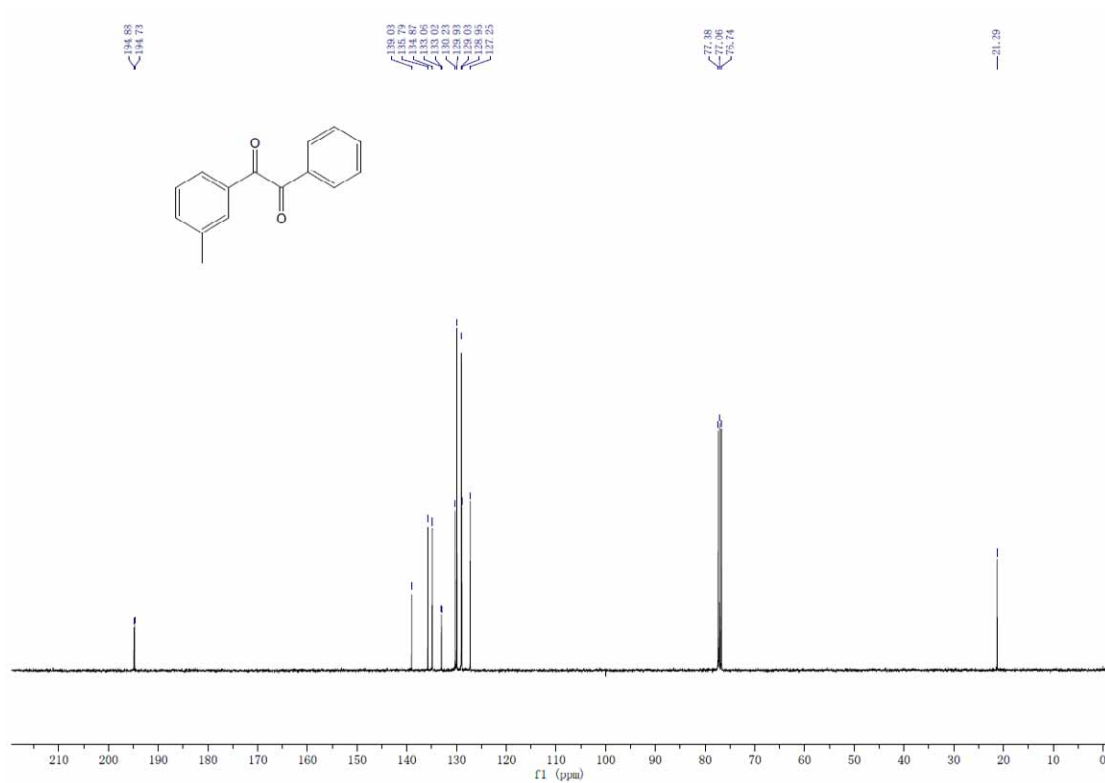



2d

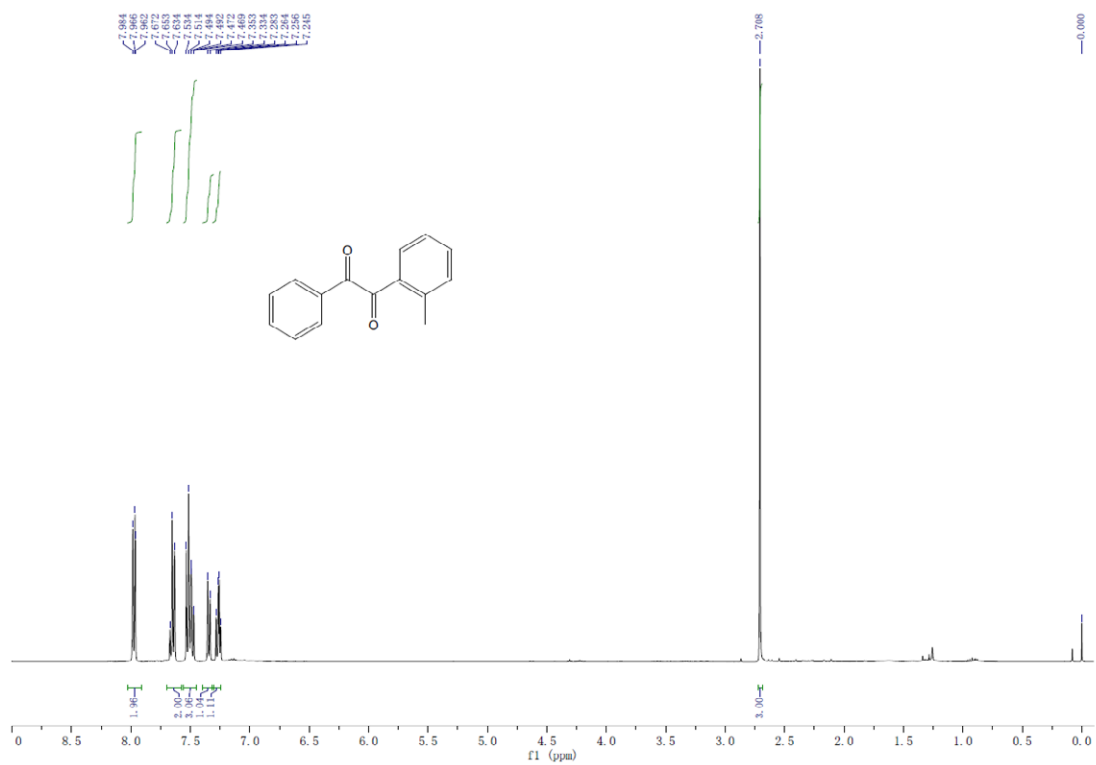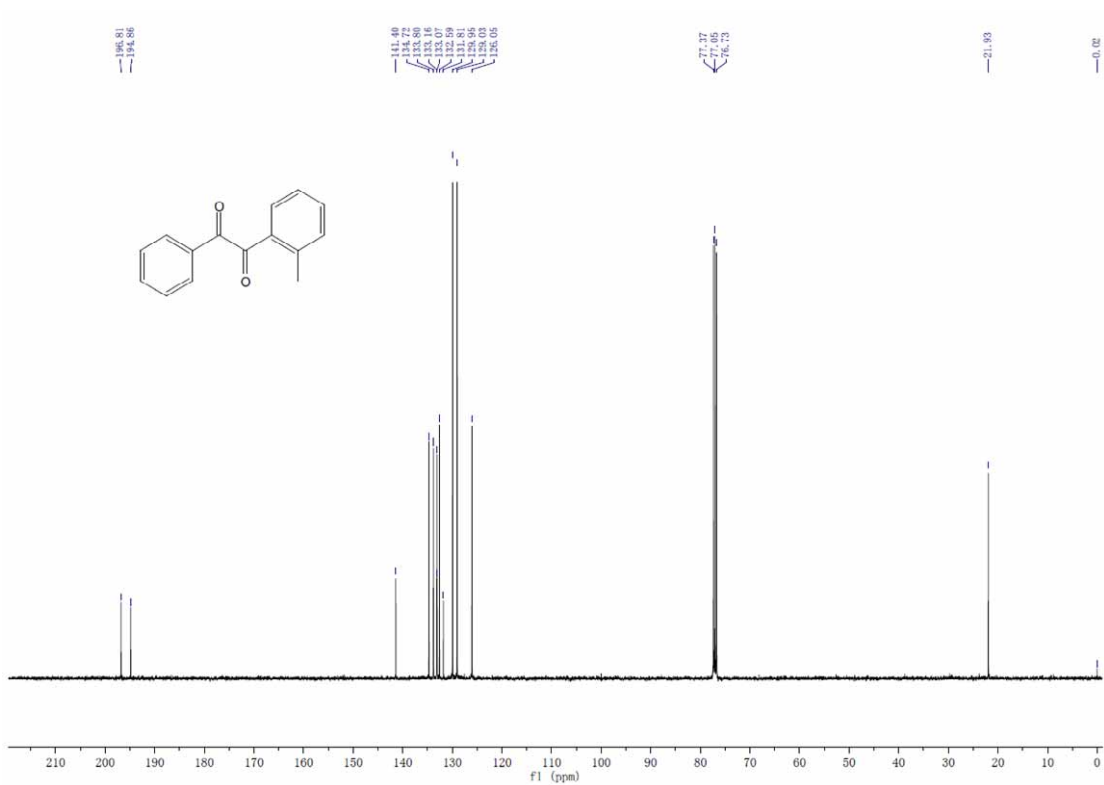

2e

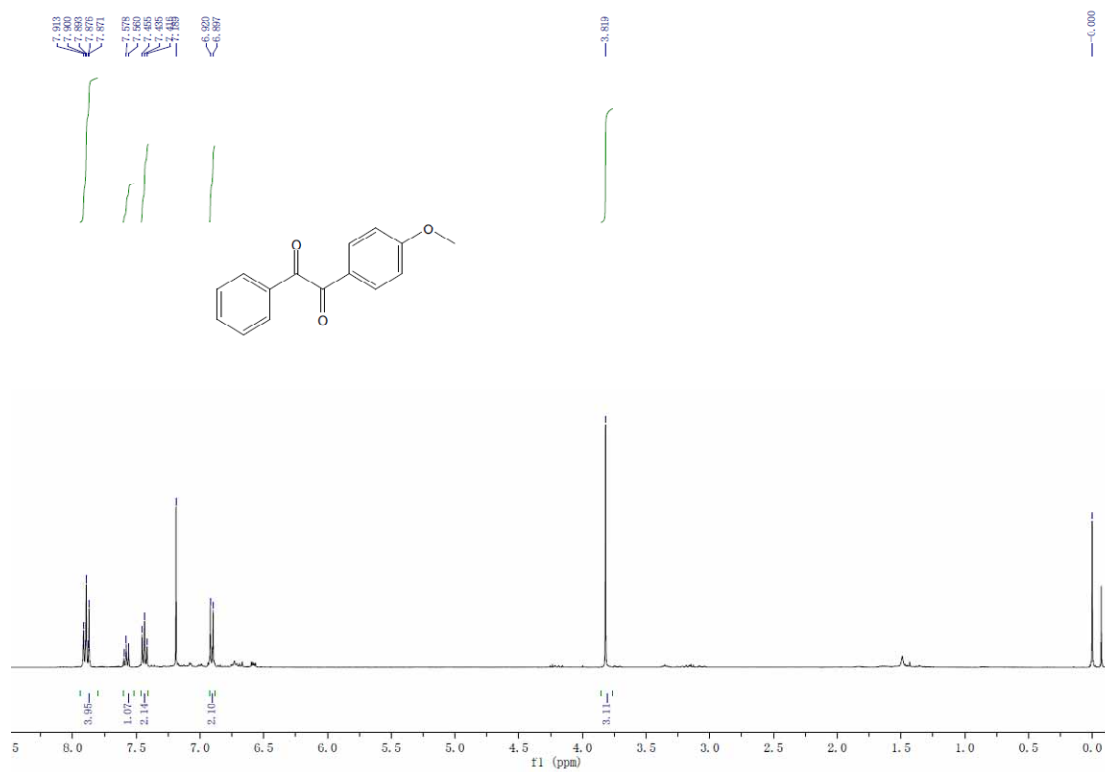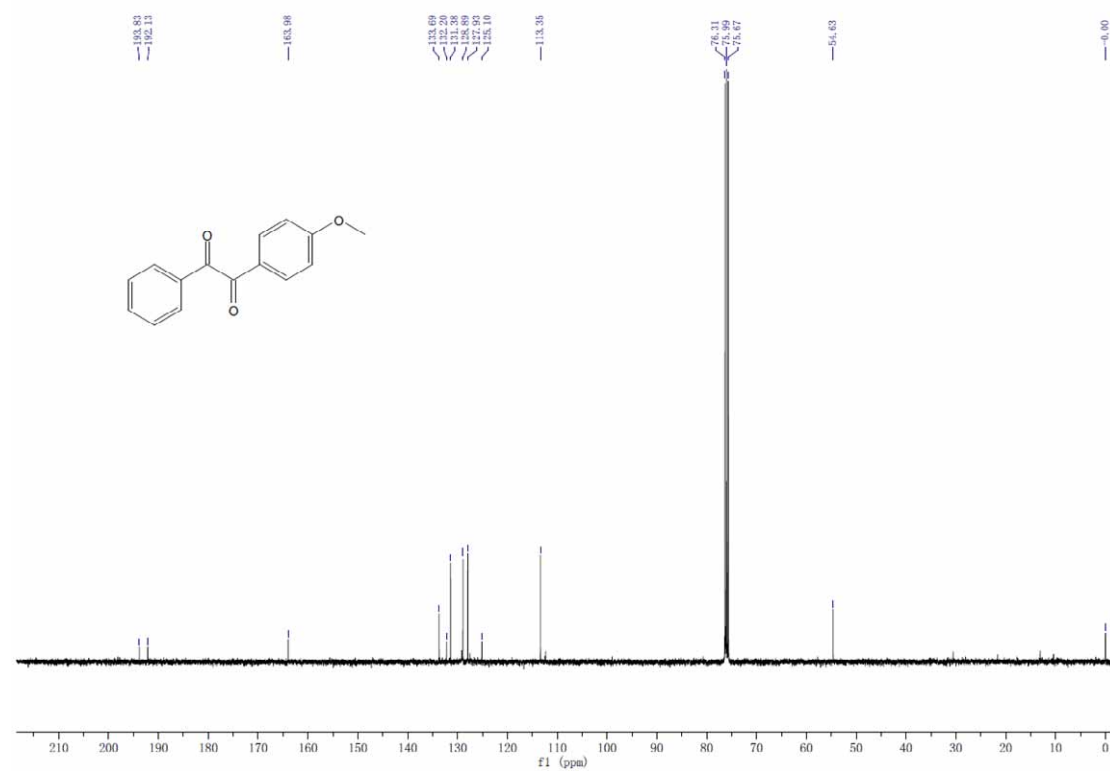

2f

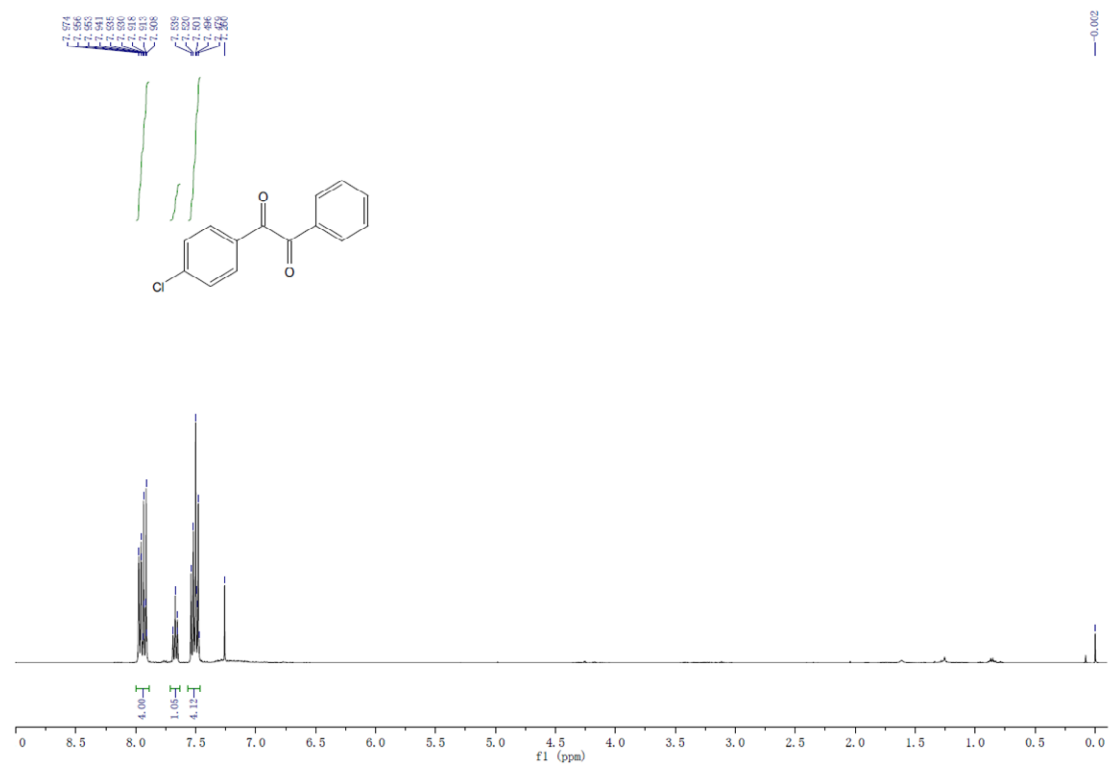

202

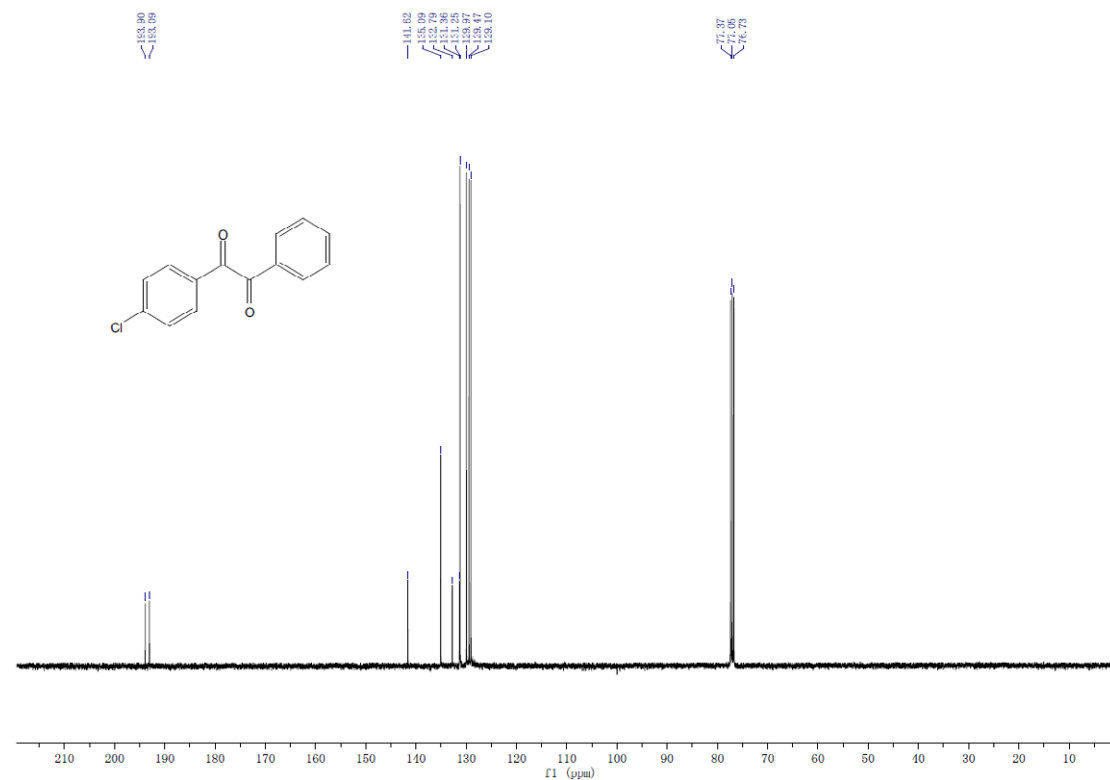

203

2g

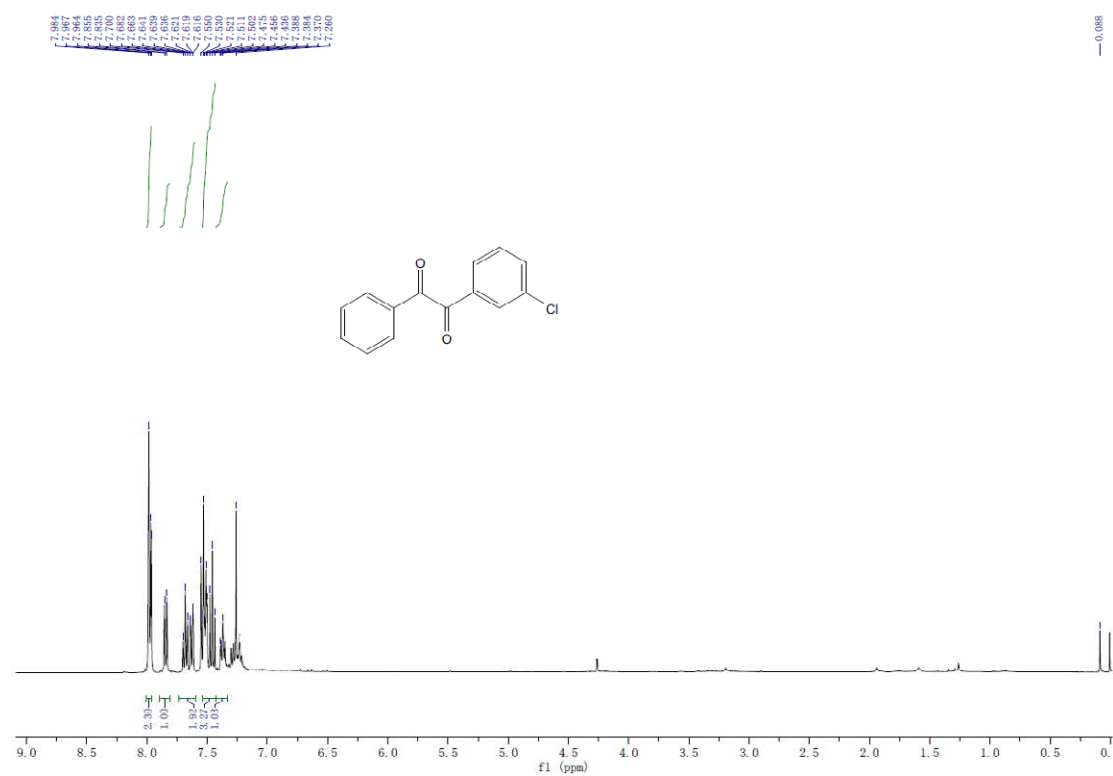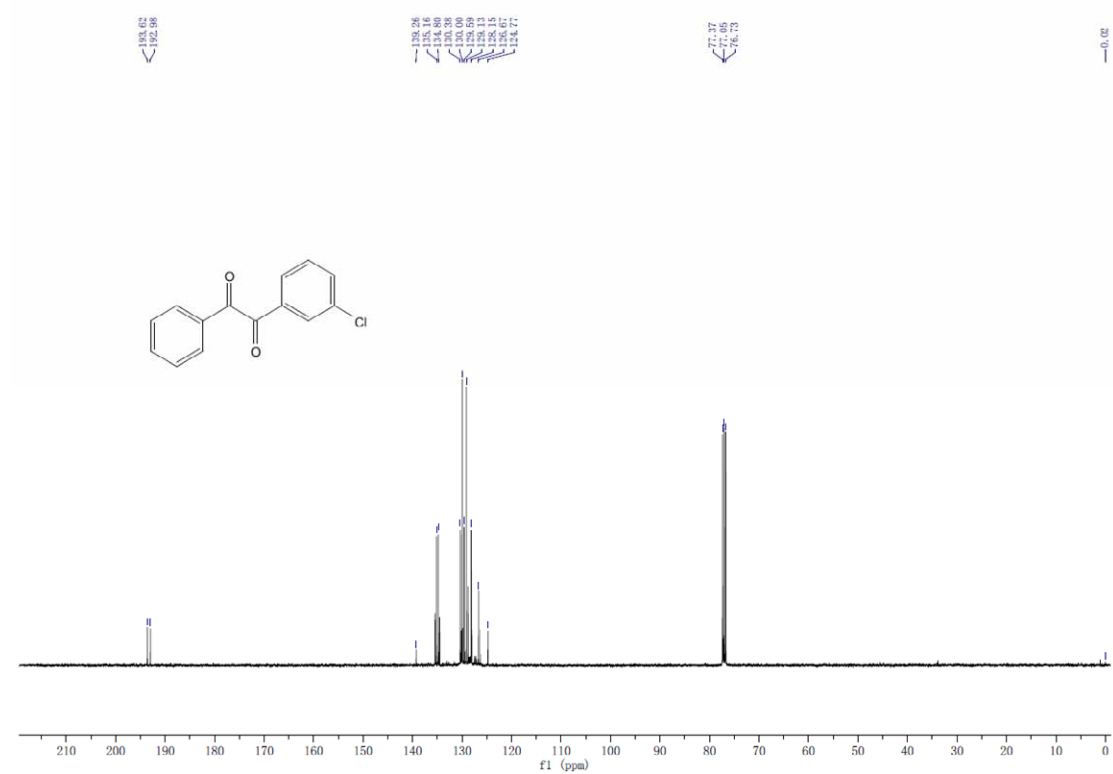

2h

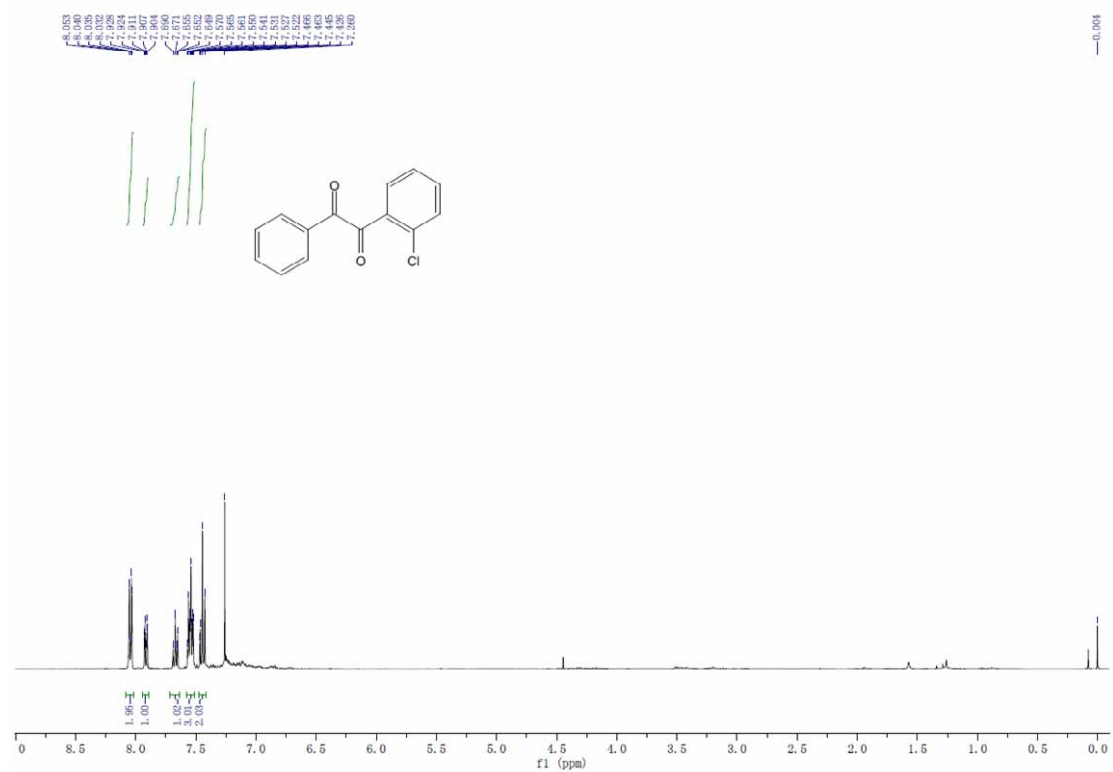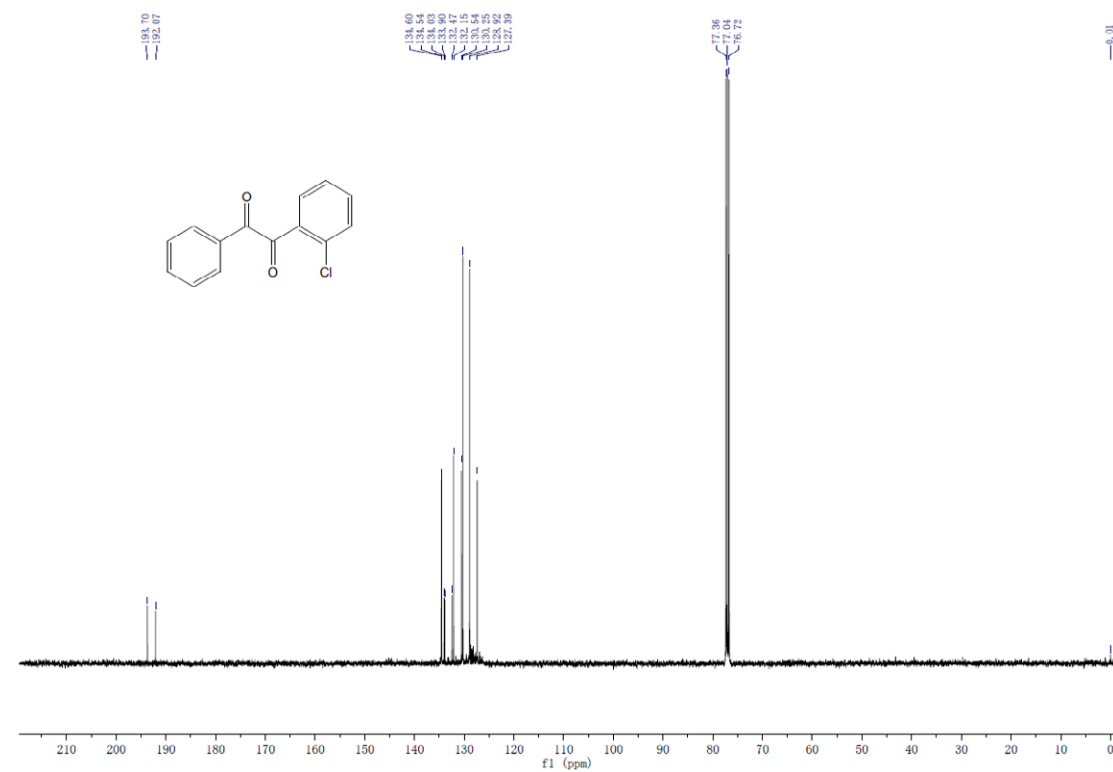

2i

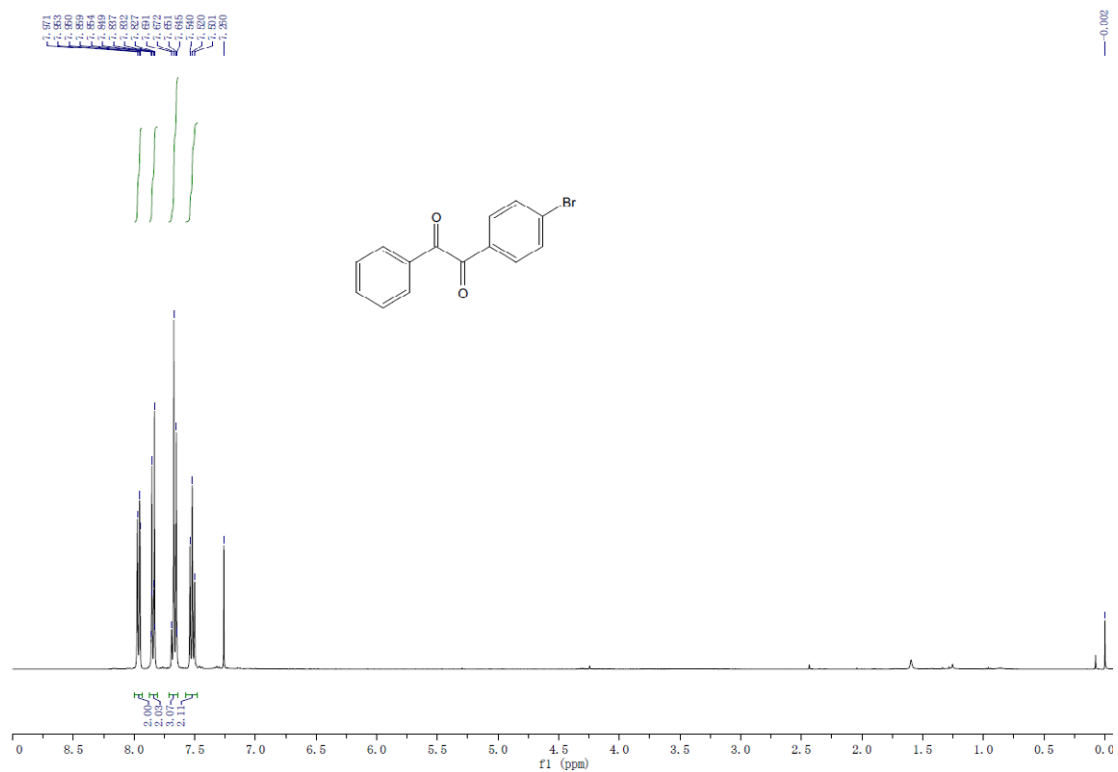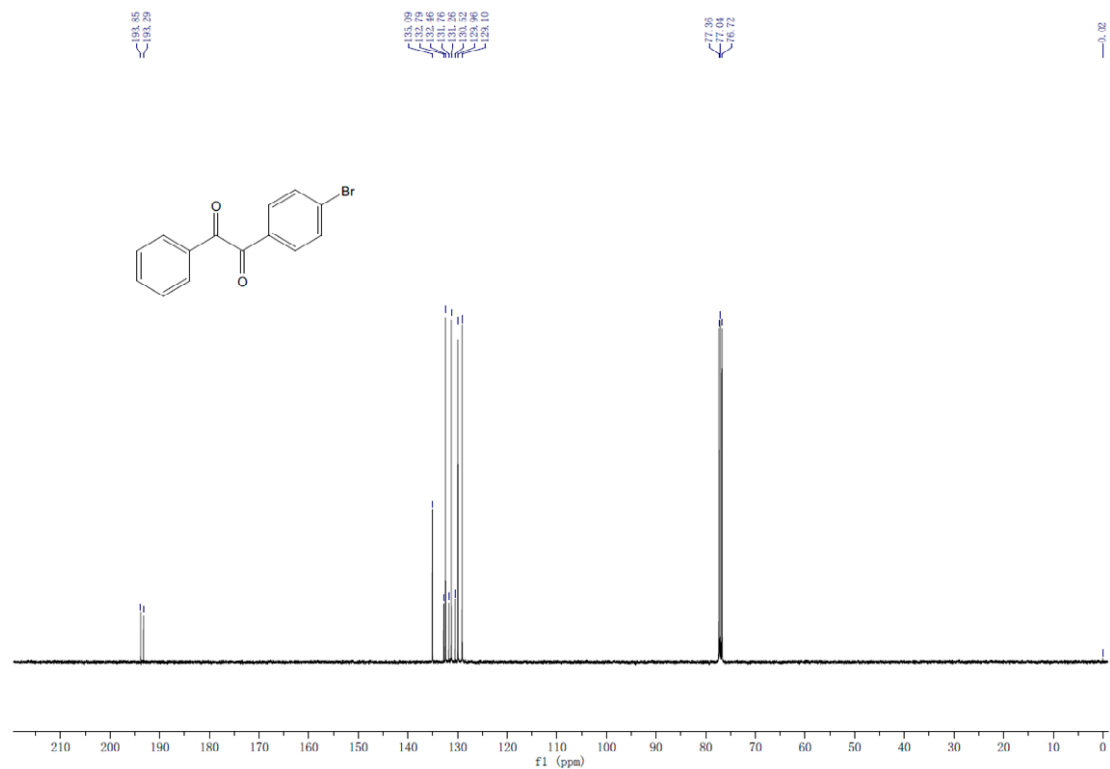

2j

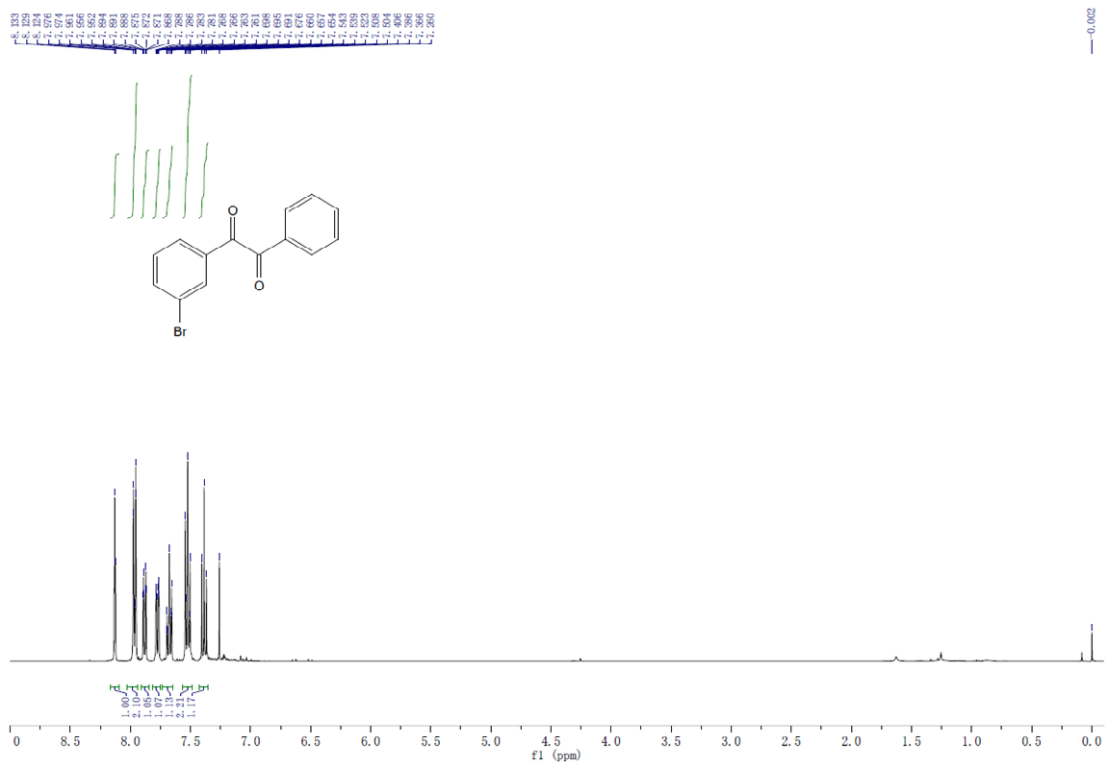

2k

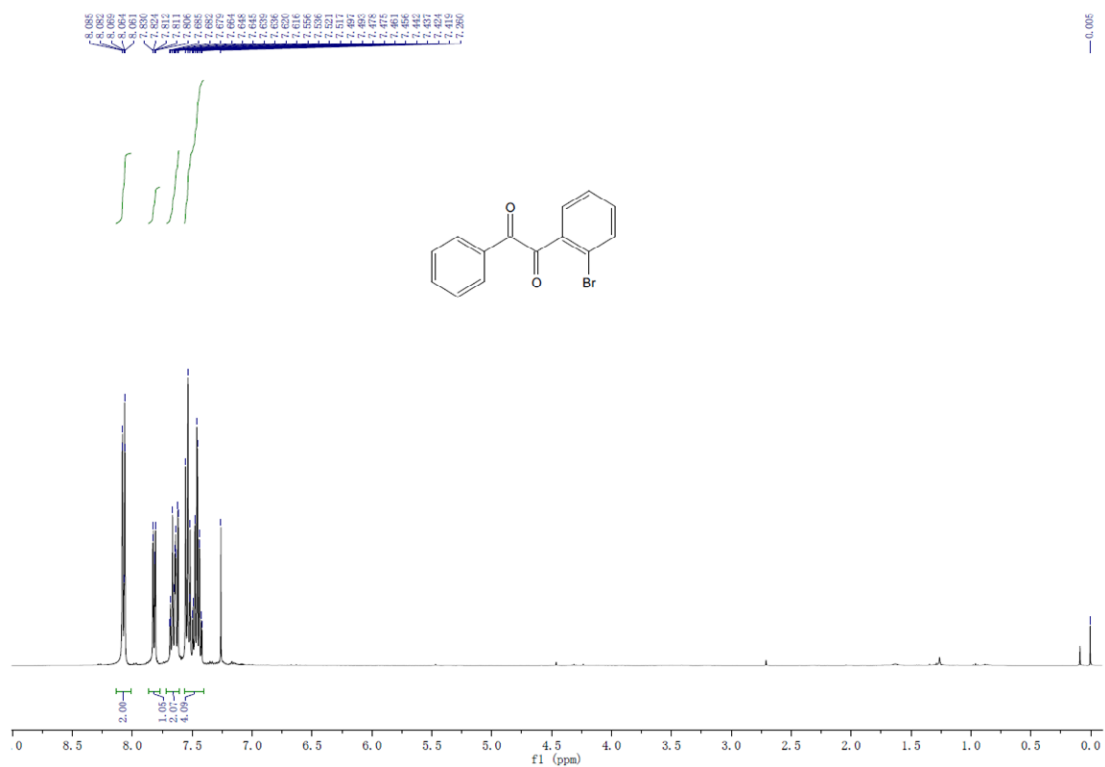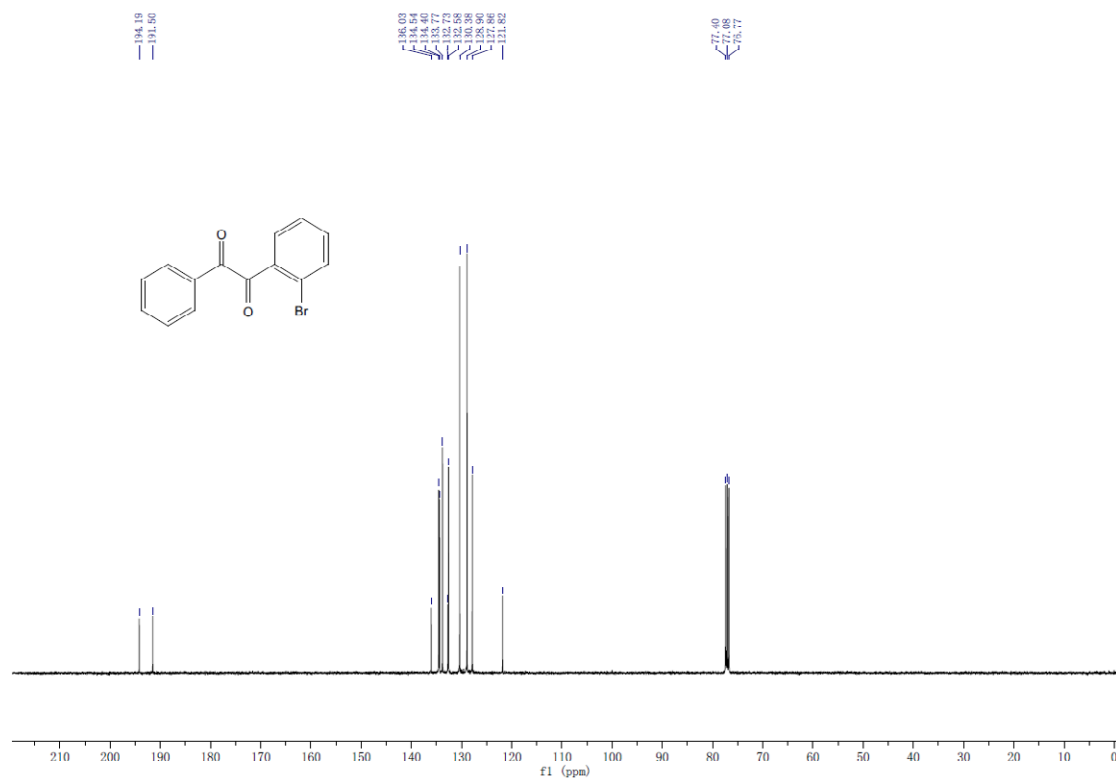



21

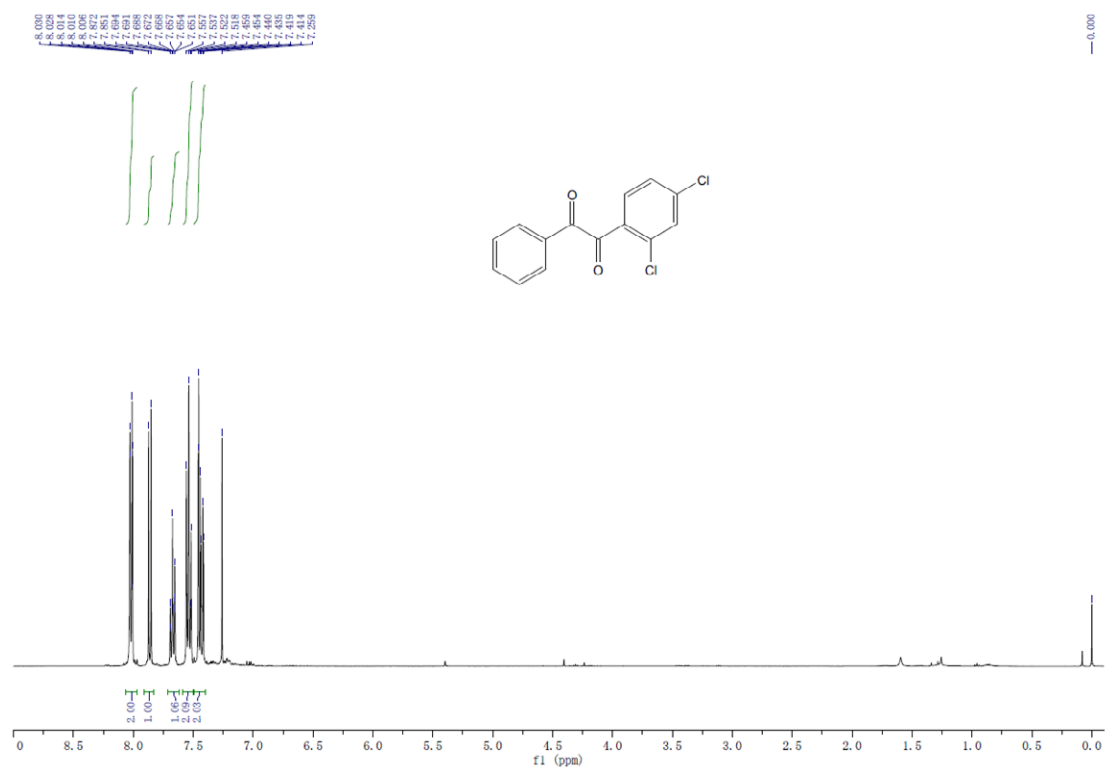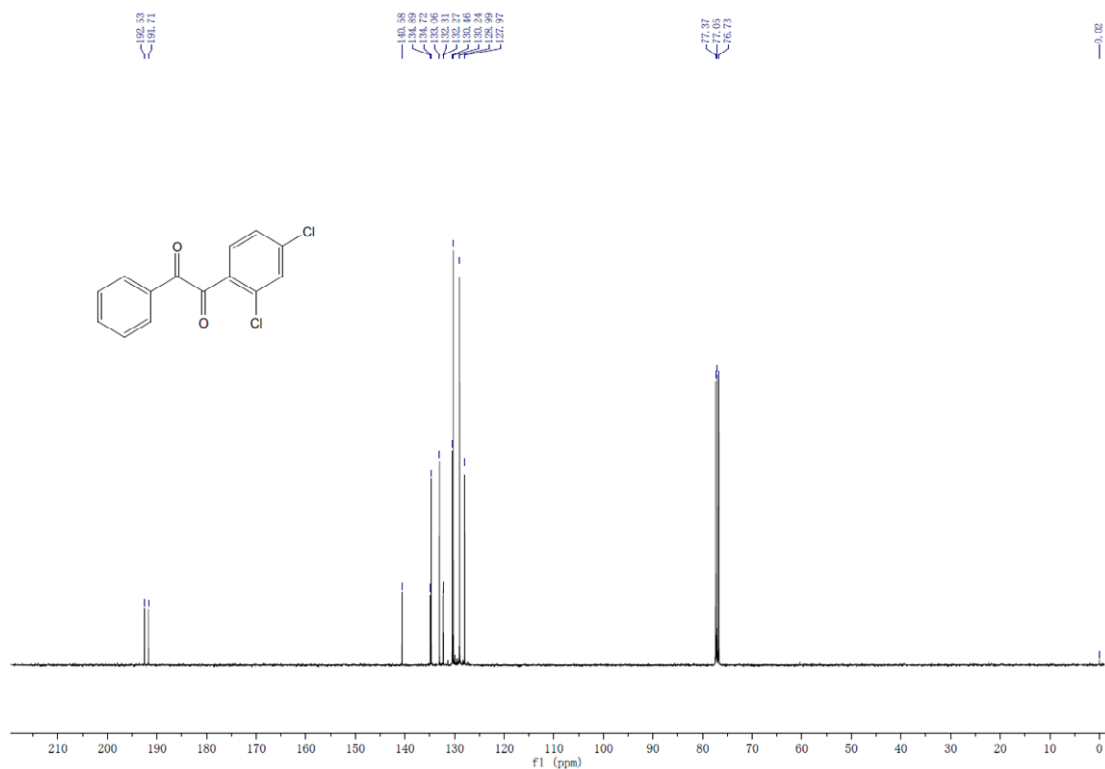

2m

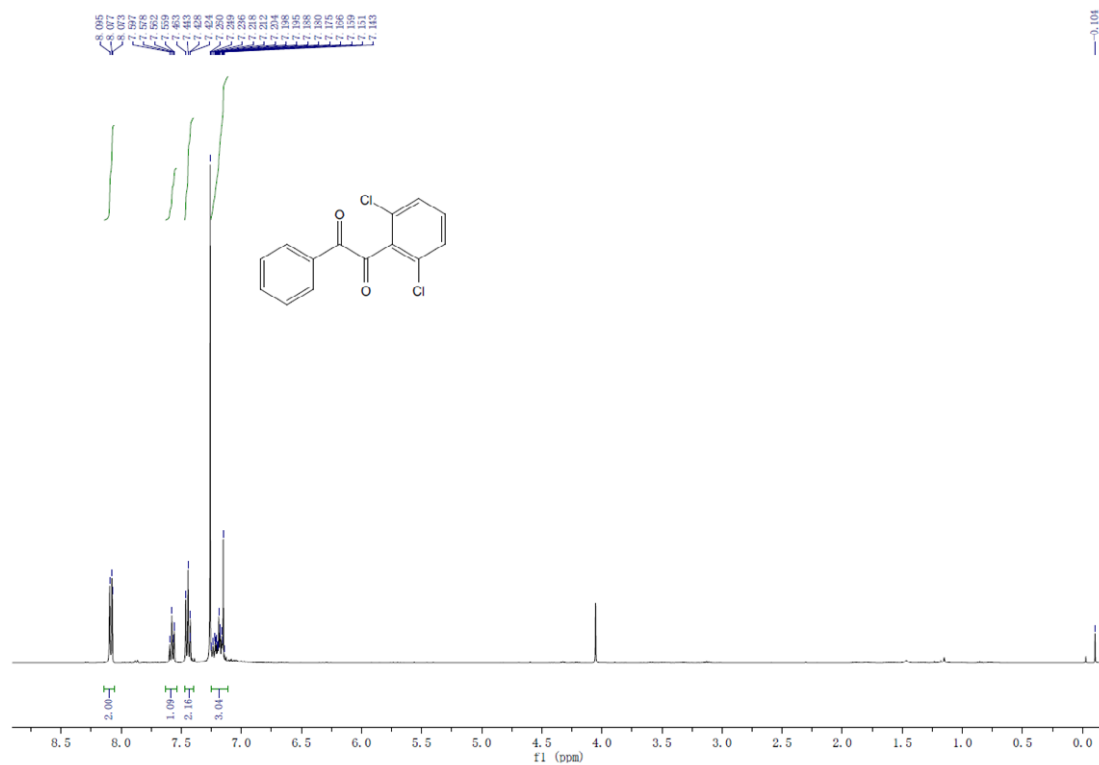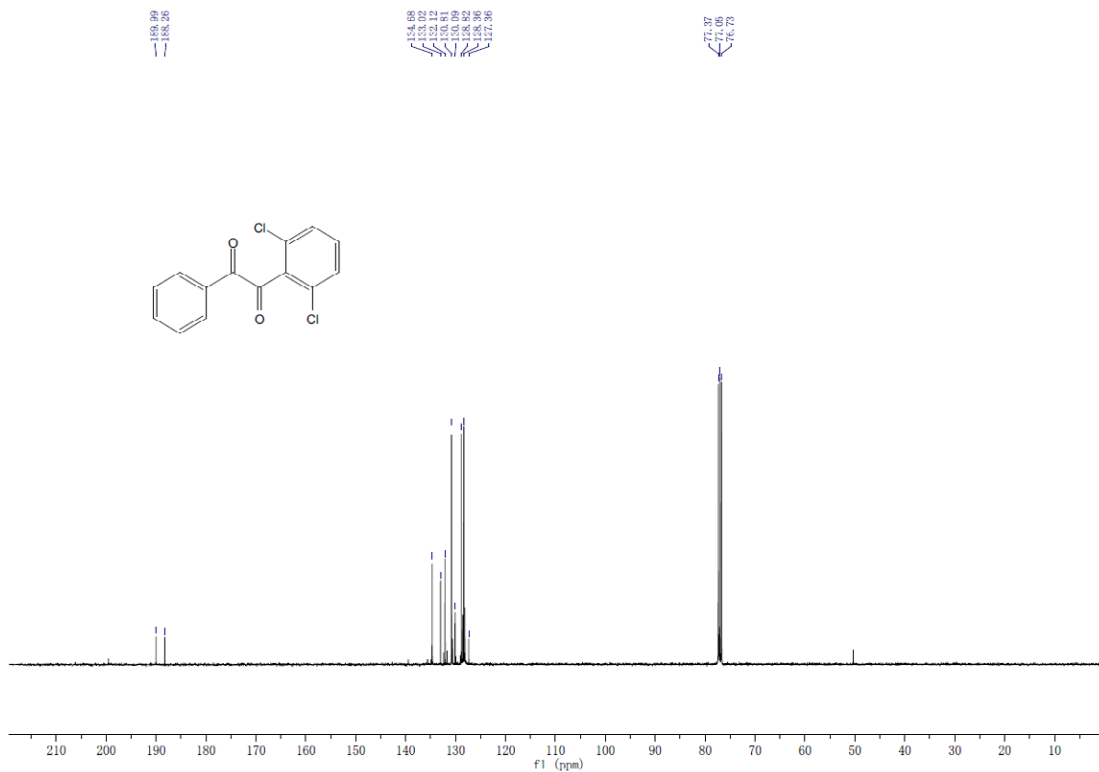



### 2o

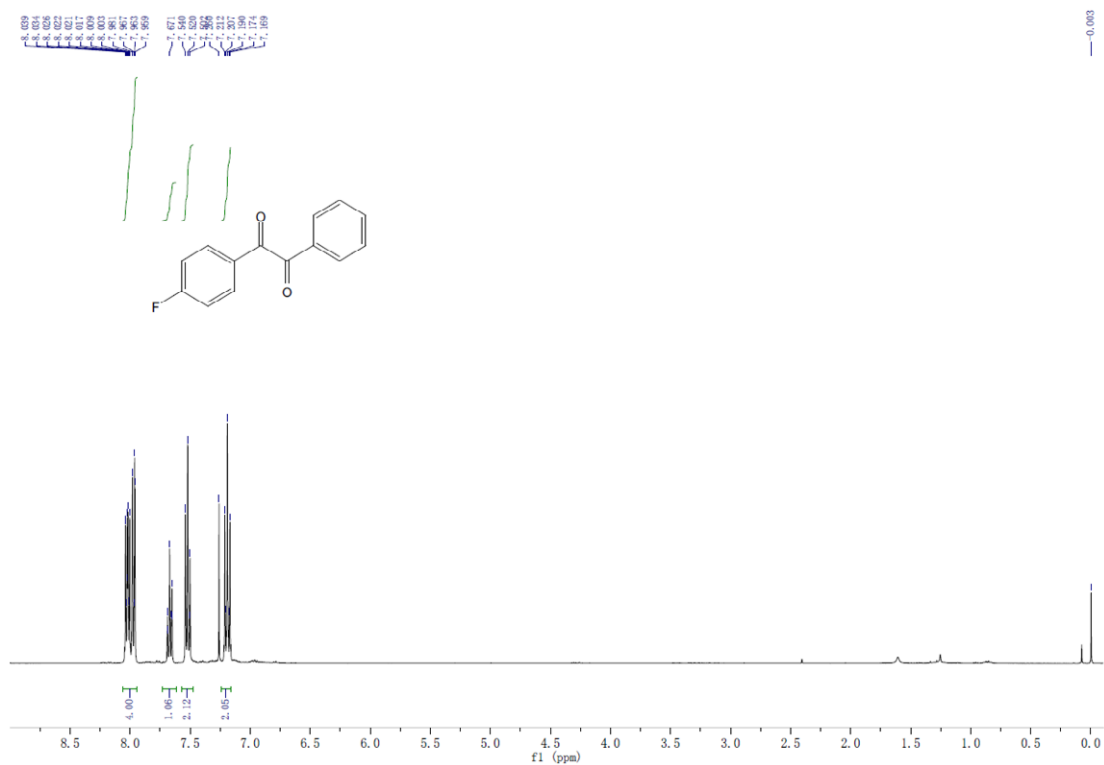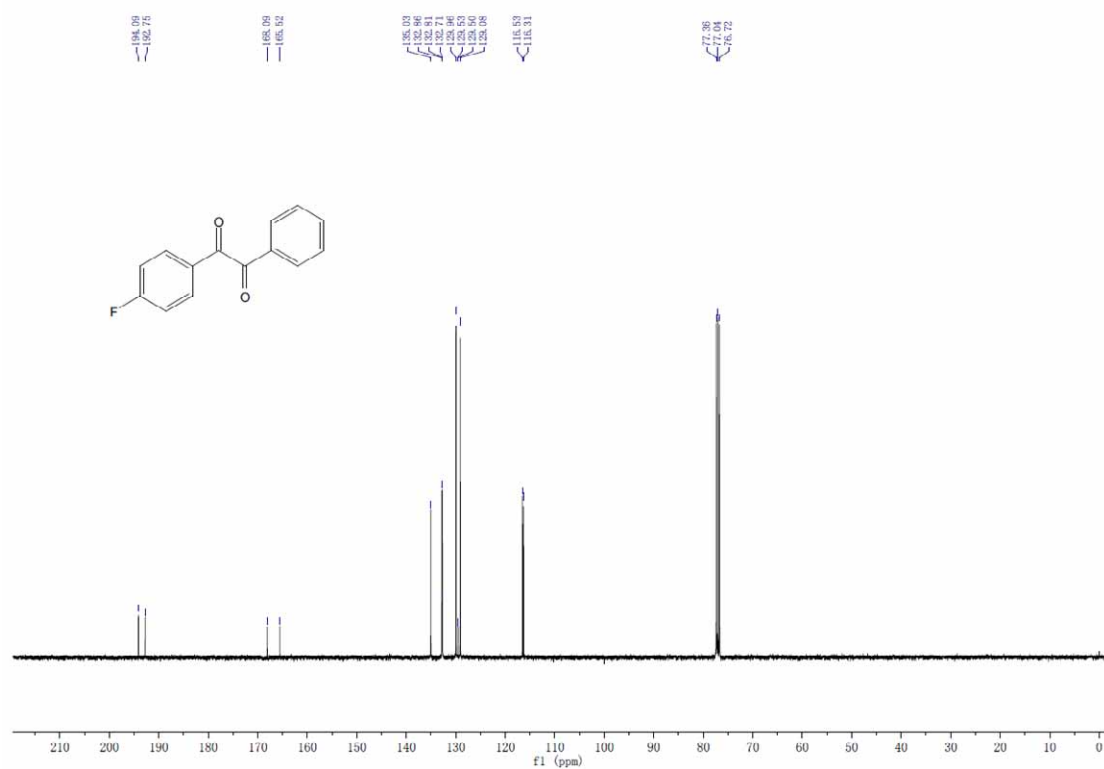

2p

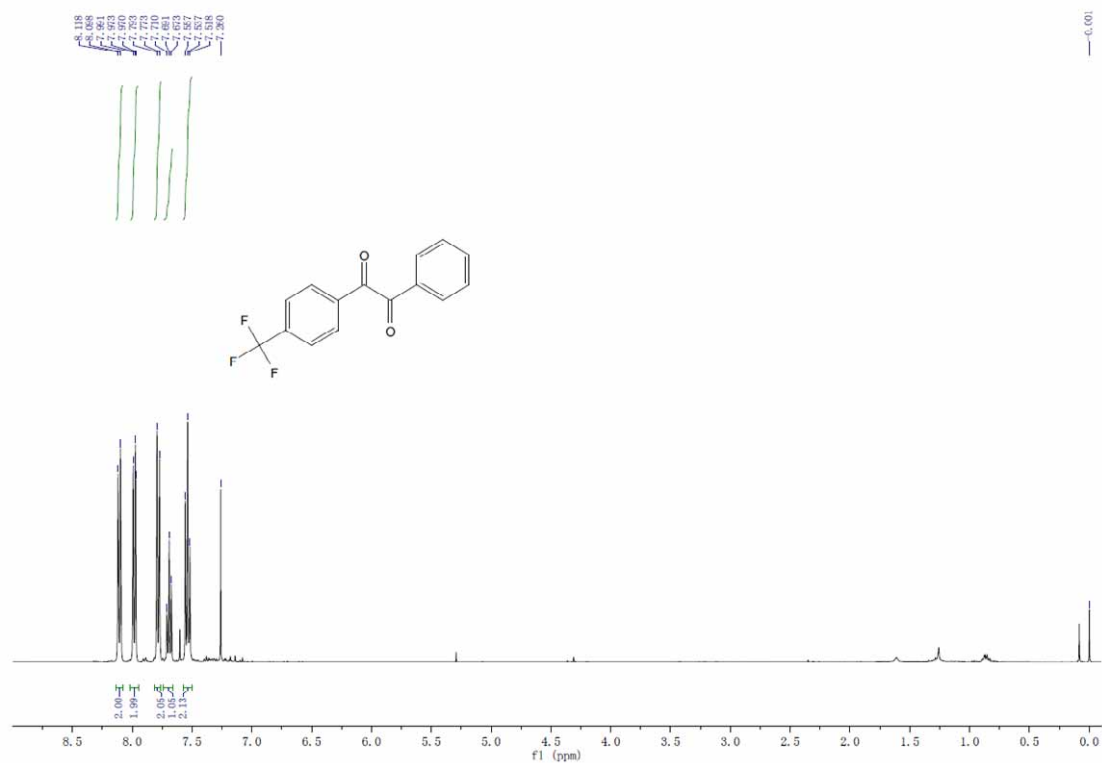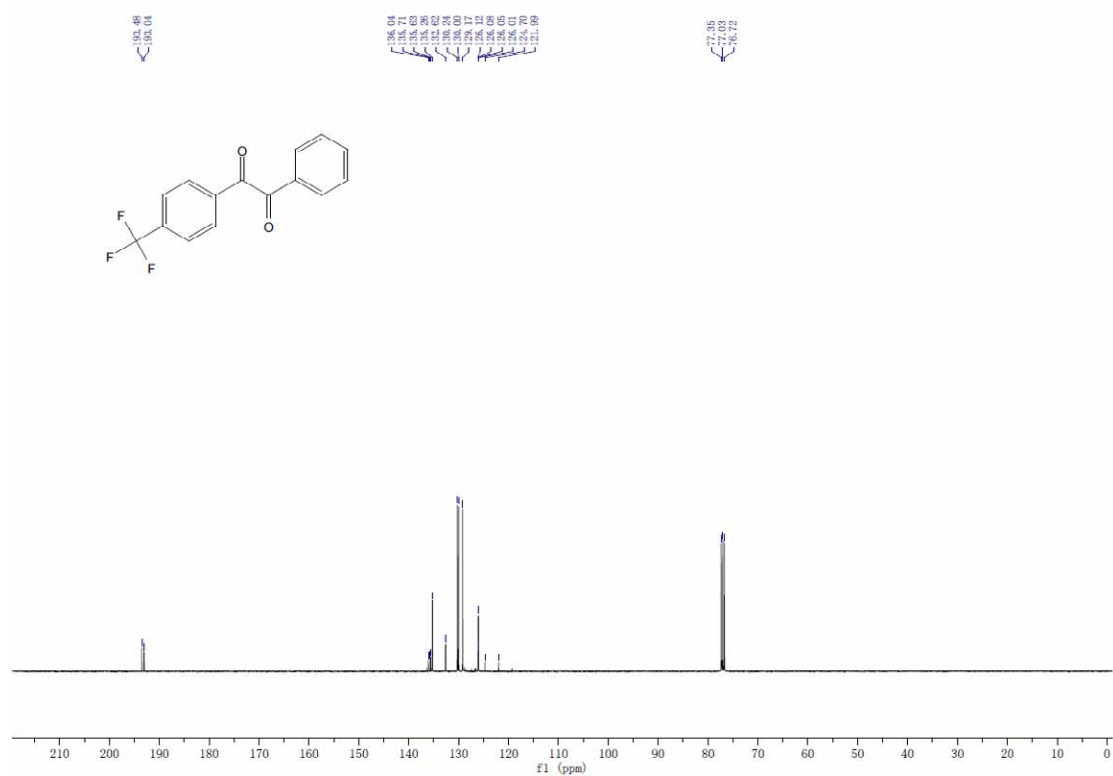

2q

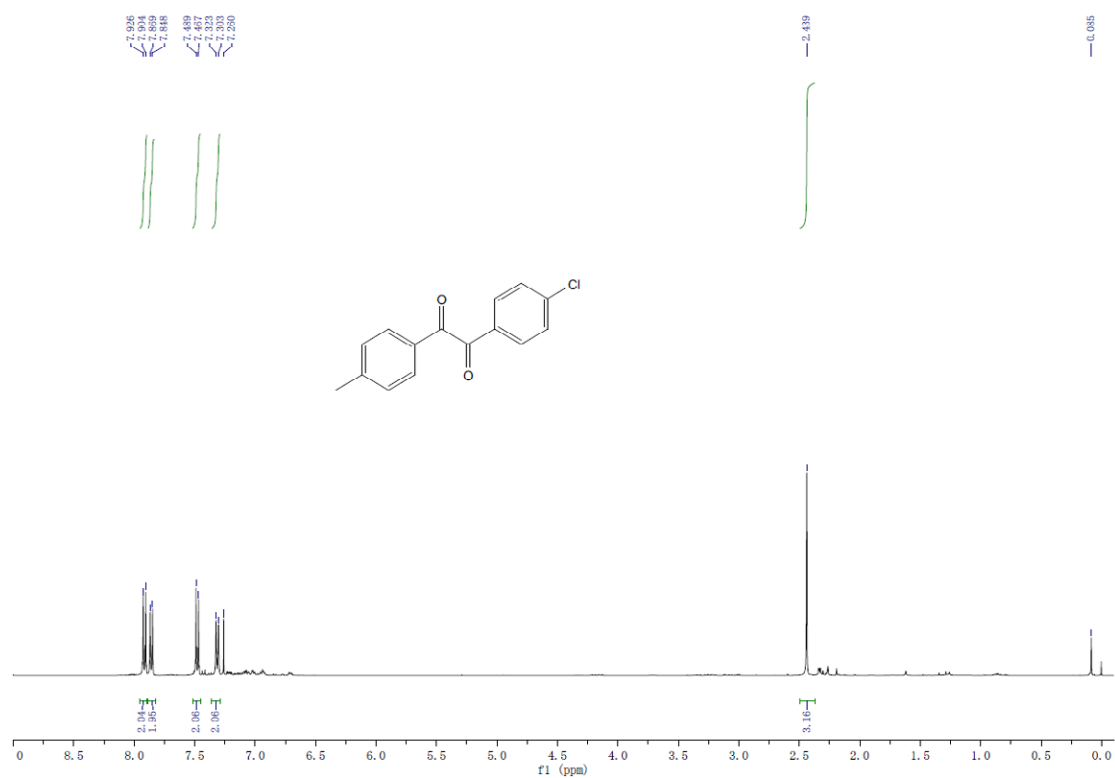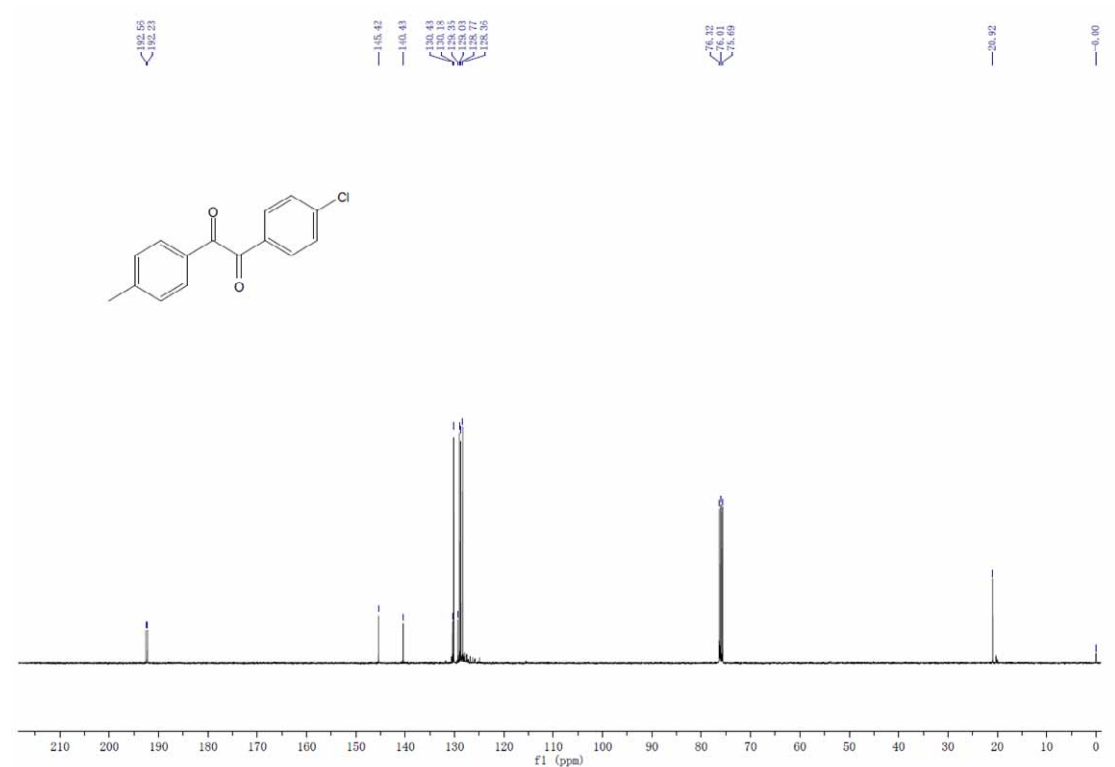

2r

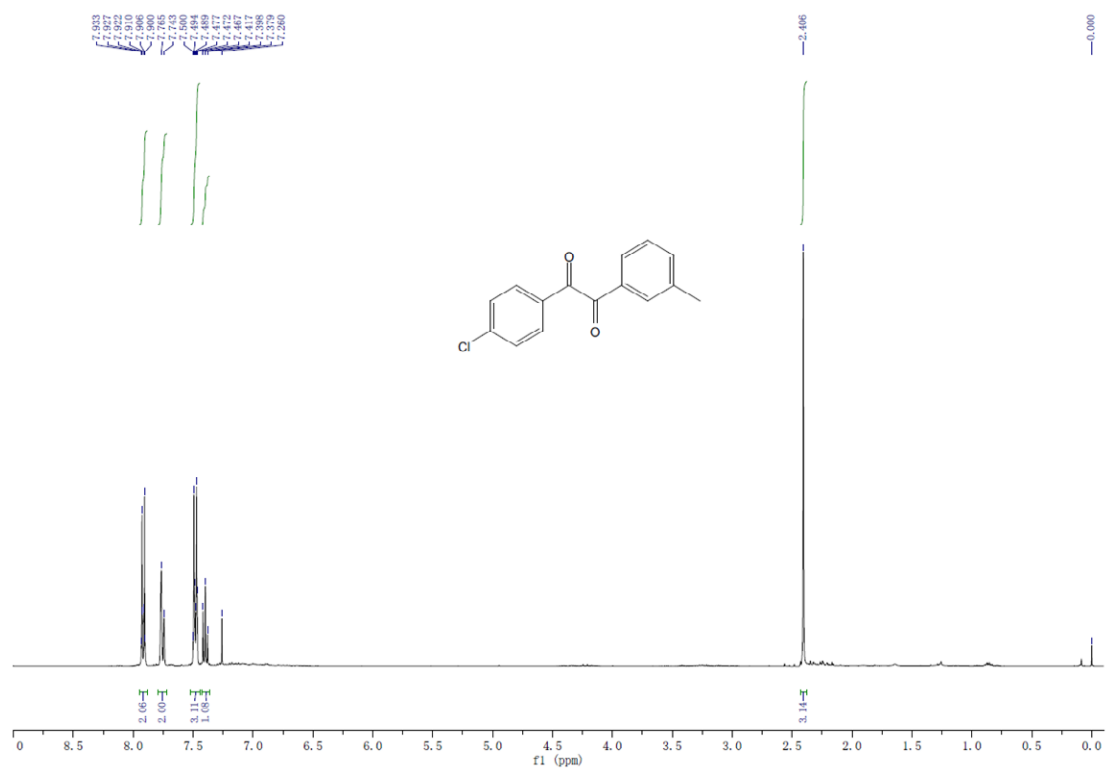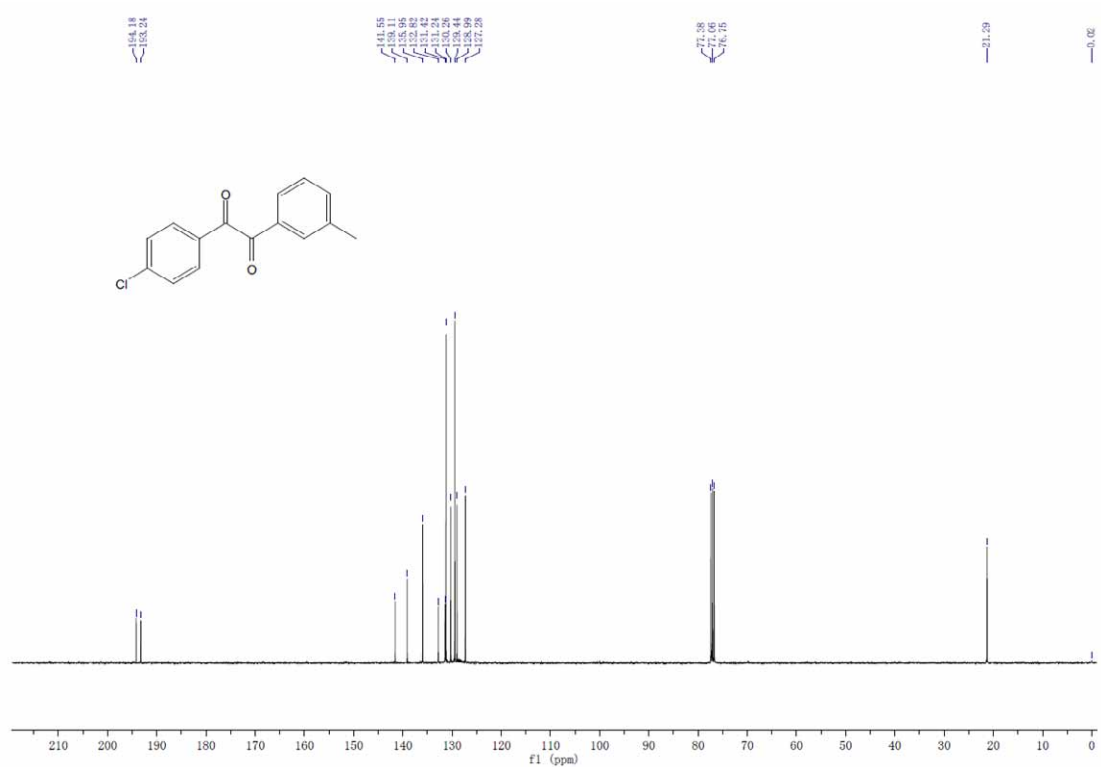

2s

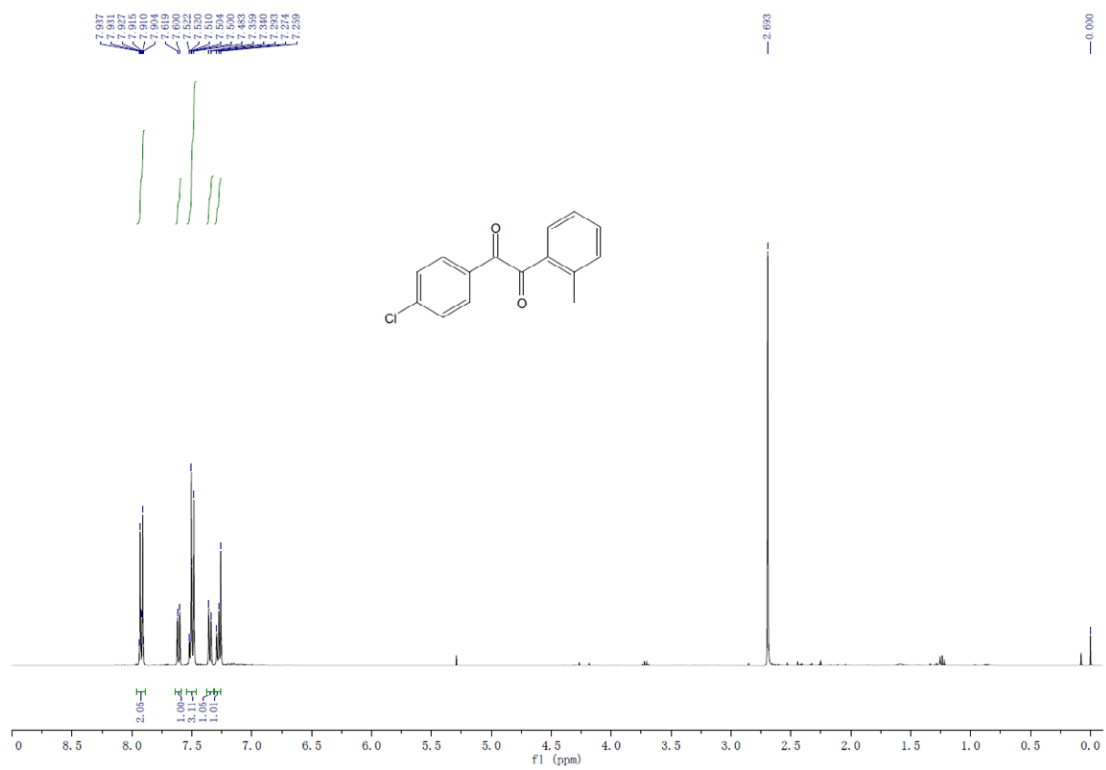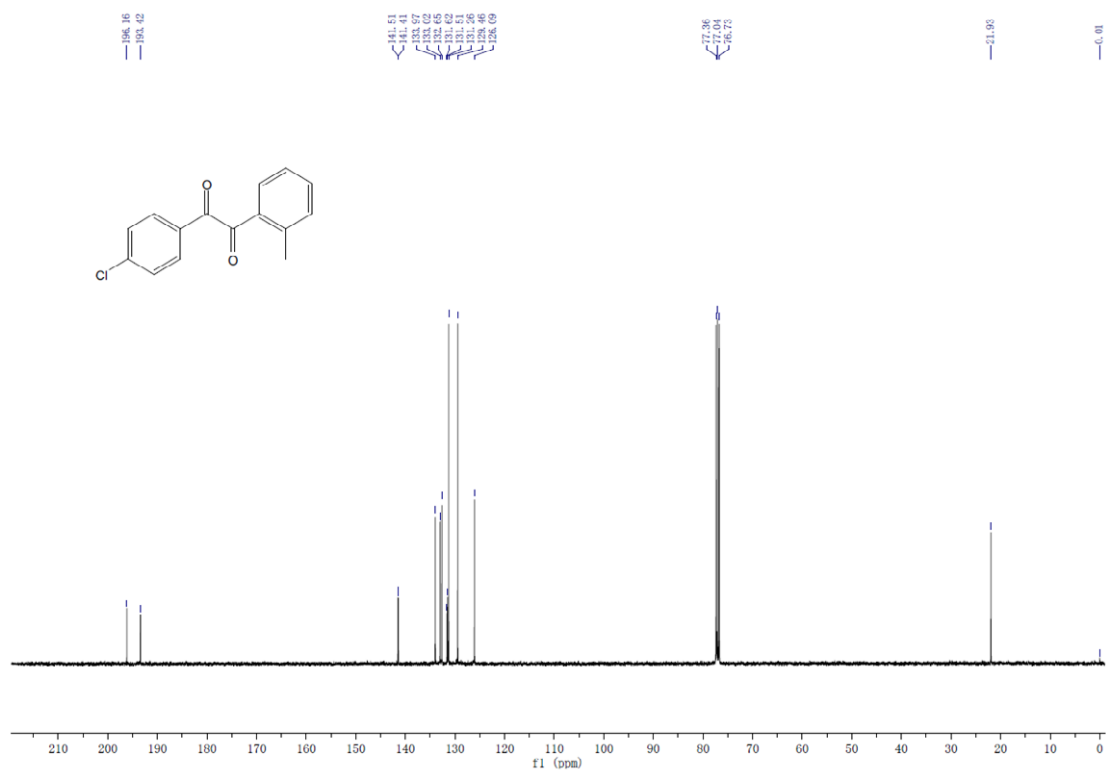



2t

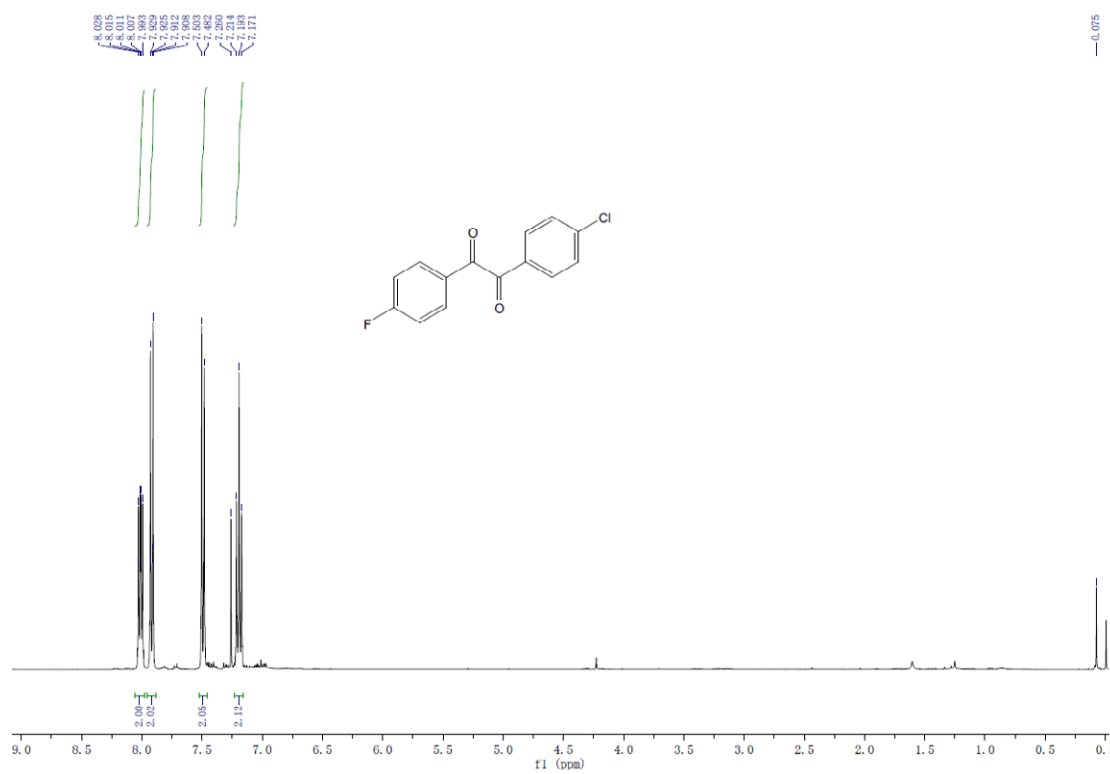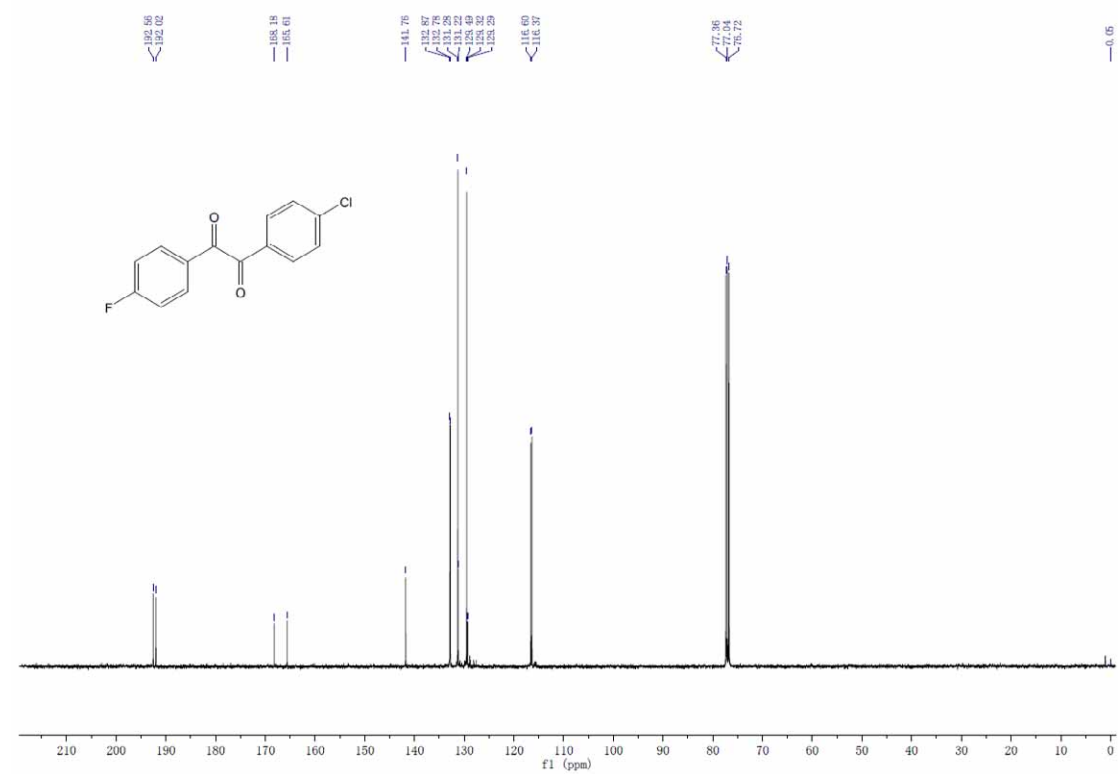

2u

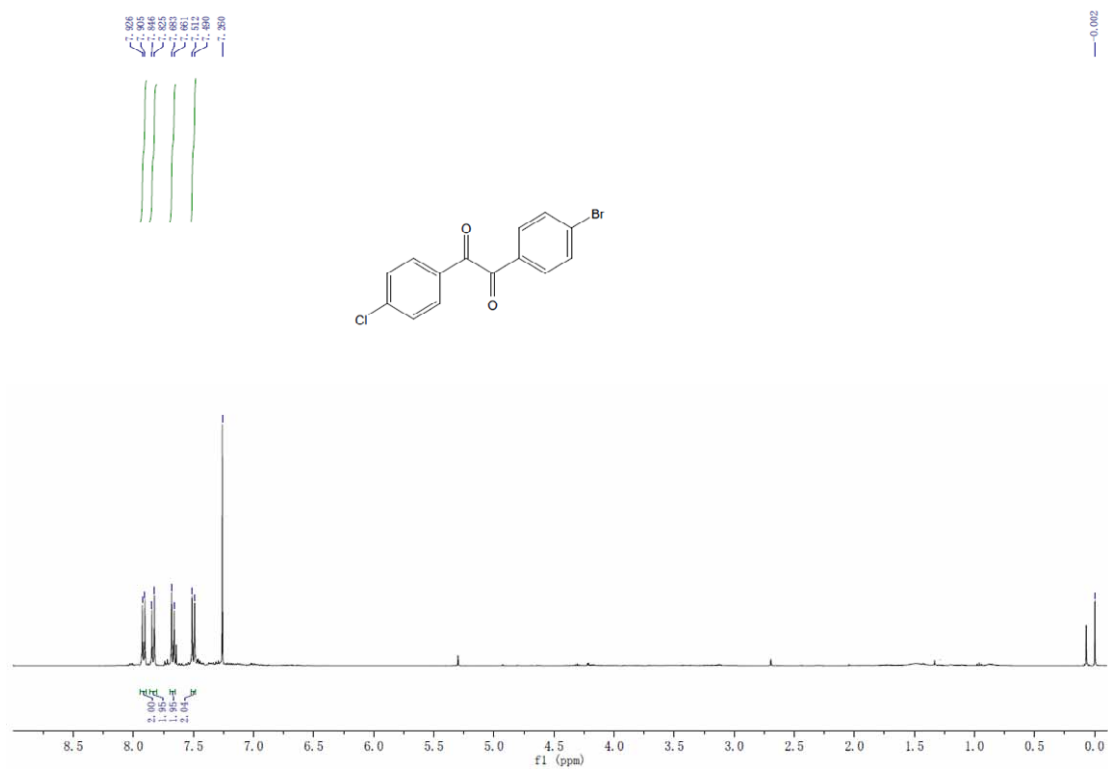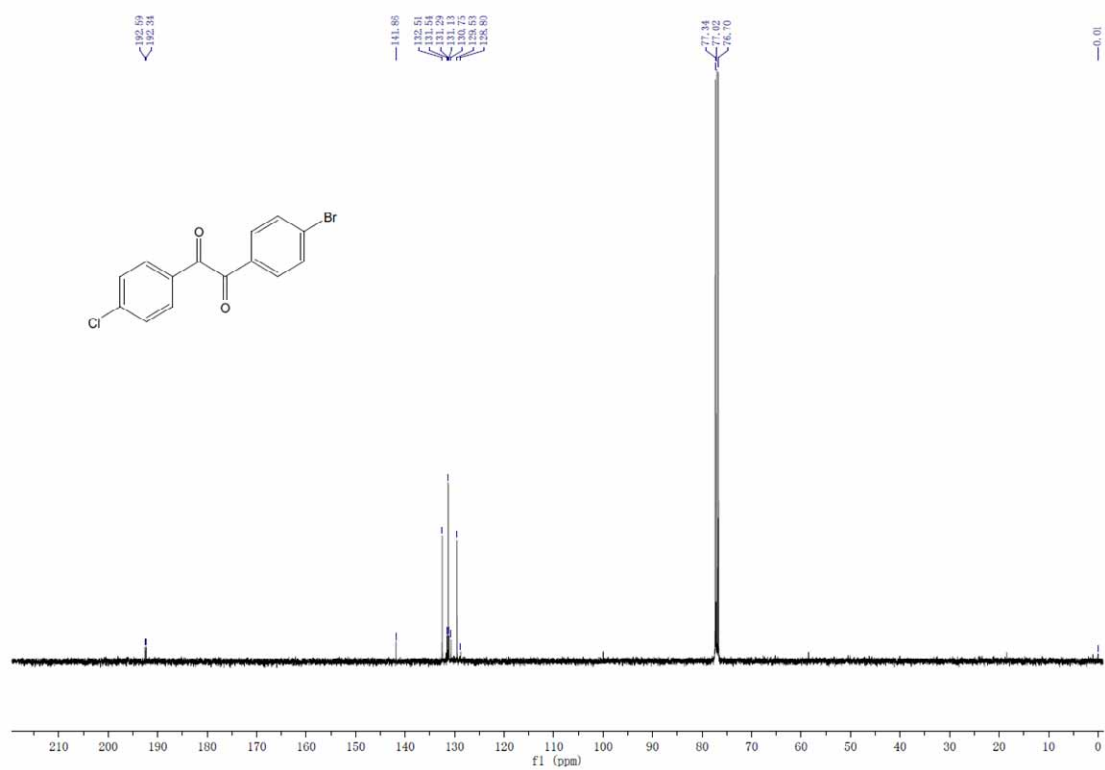

2v

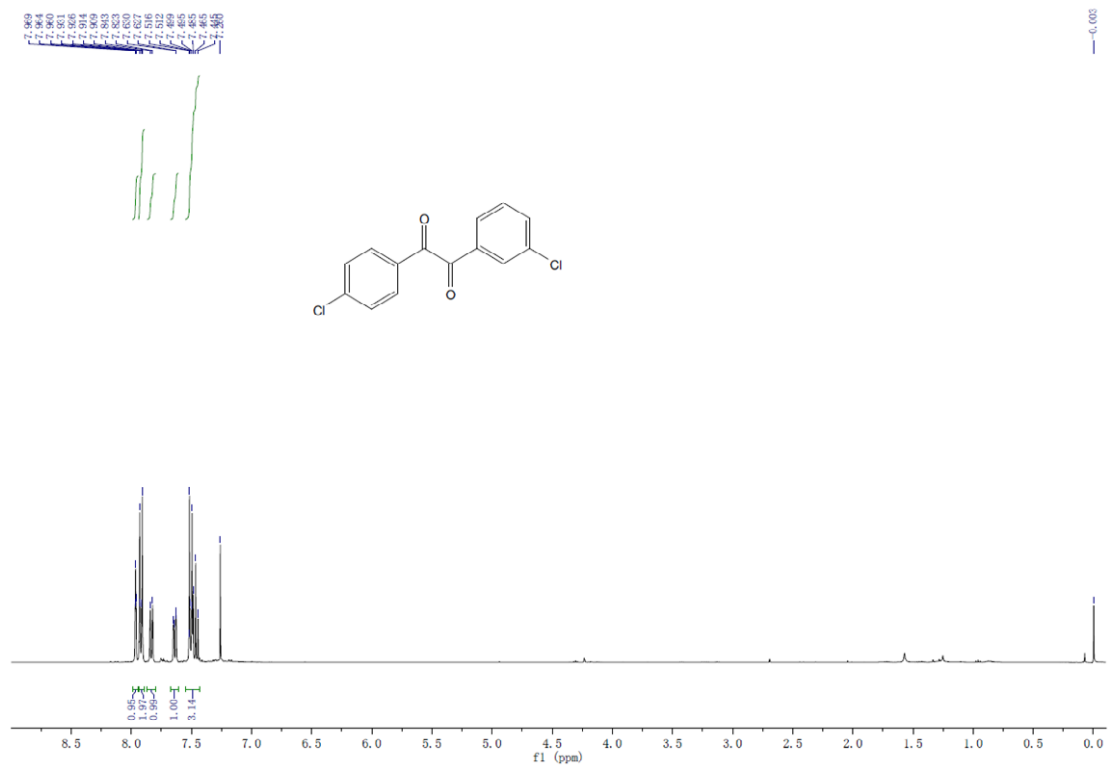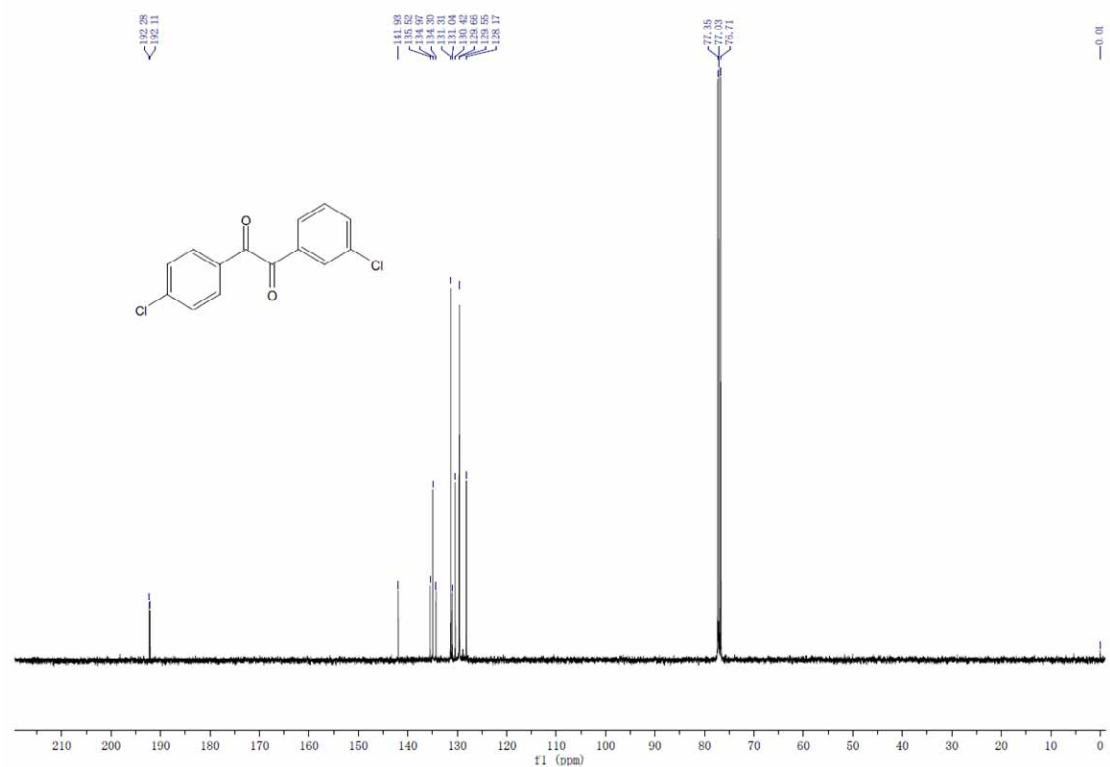

2w

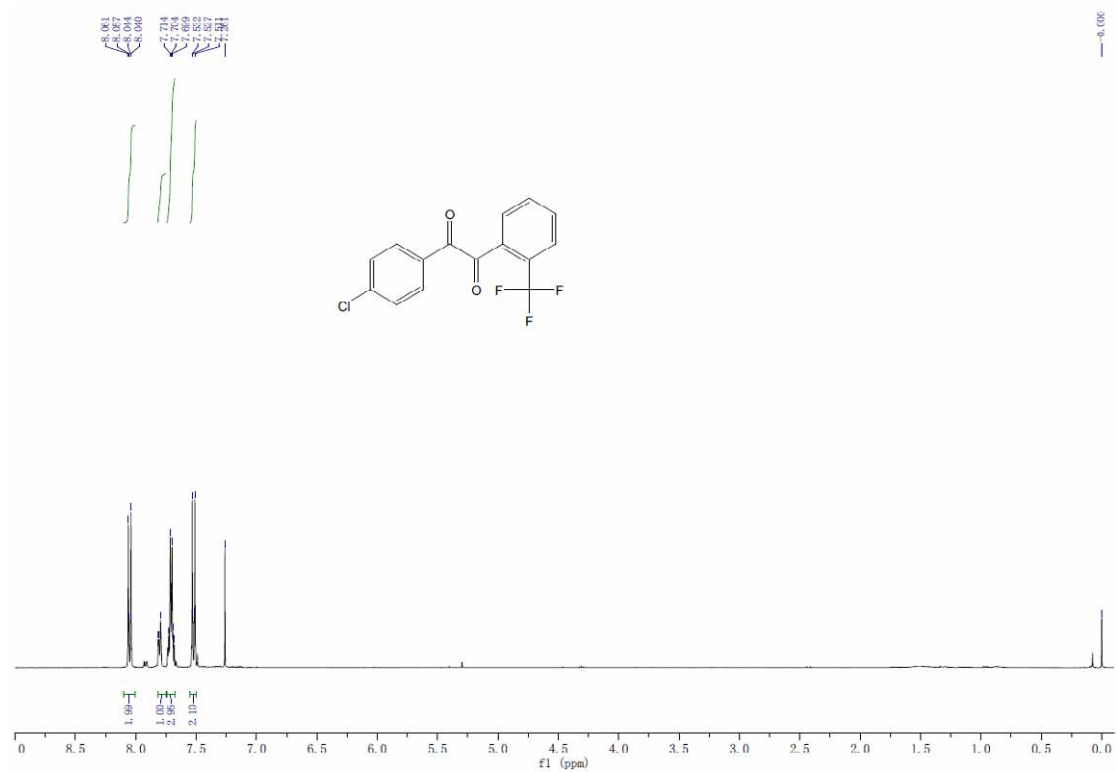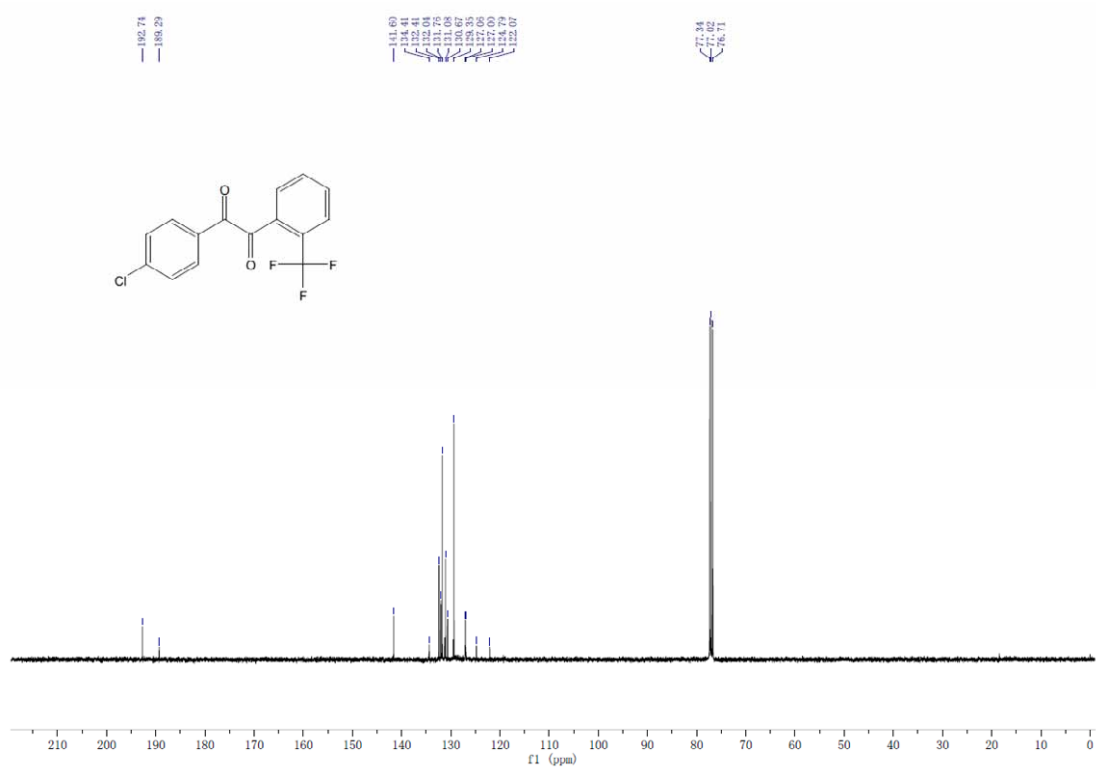

Supplement: c3ra41489b.pdf [file c3ra41489b.pdf]
